# Supplementary material for: Antiproliferative Activity Predictor: A New Reliable In Silico Tool for Drug Response Prediction against NCI60 Panel
Source: MDPI journal article supplement (doi:10.3390/ijms232214374), 2022-11-19

Leukemia

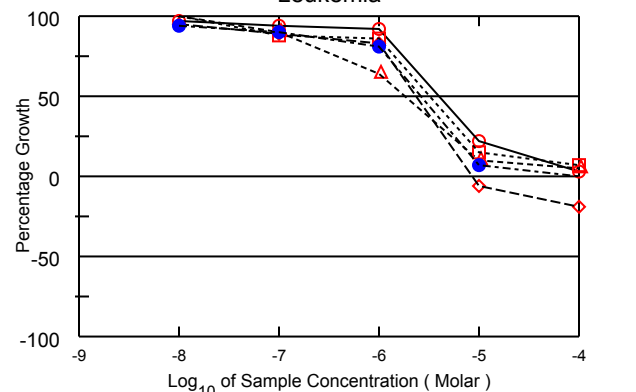

Non-Small Cell Lung Cancer

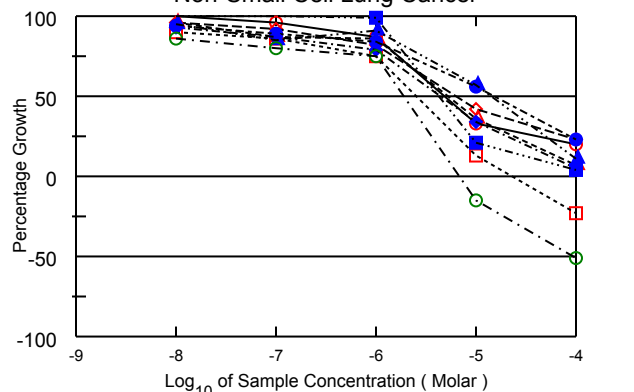

Colon Cancer

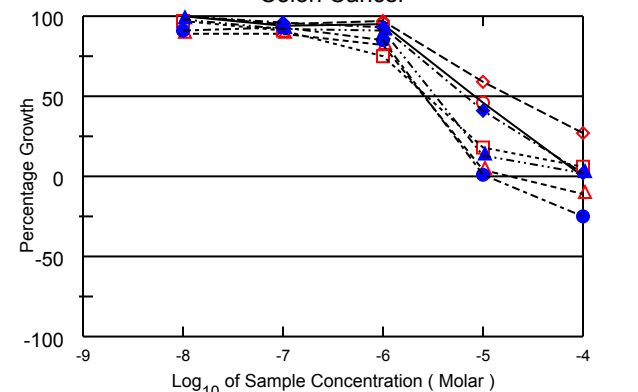

CNS Cancer

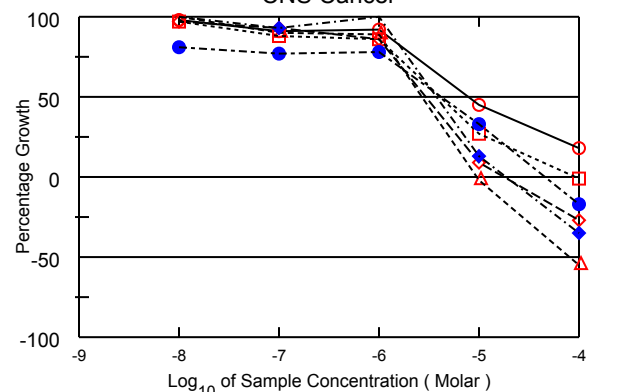

Melanoma

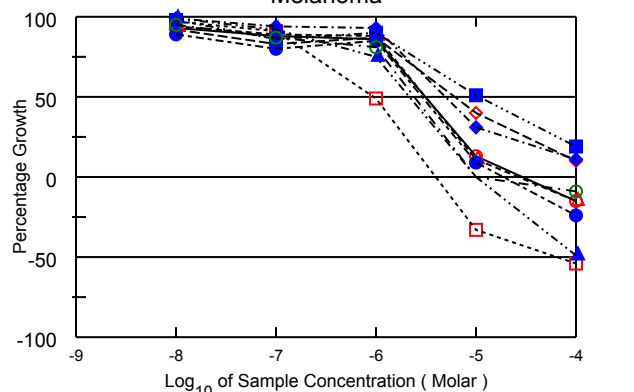

Ovarian Cancer

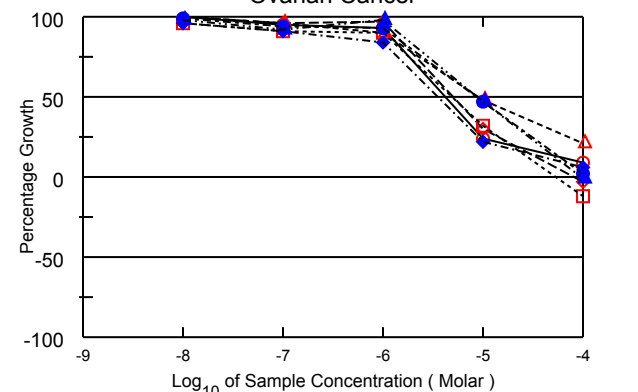

Renal Cancer

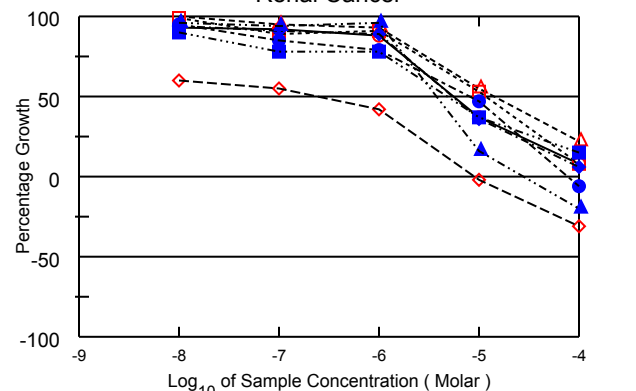

Prostate Cancer

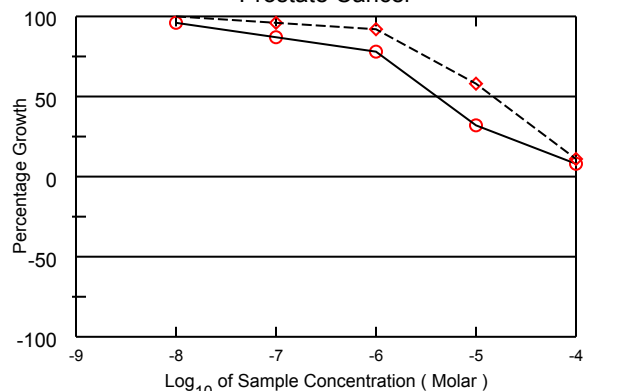

Breast Cancer

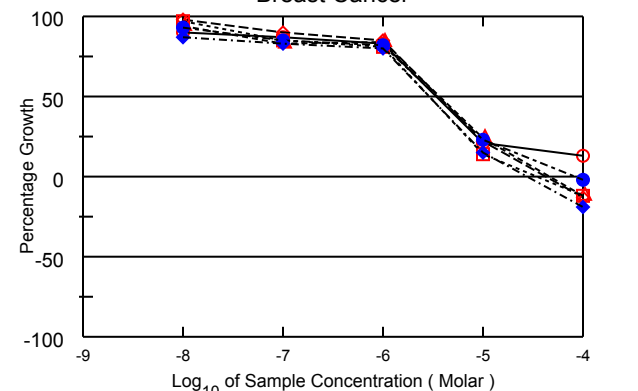

National Cancer Institute Developmental Therapeutics Program  
In-Vitro Testing Results

|                                  |                                       |                |               |
|----------------------------------|---------------------------------------|----------------|---------------|
| NSC : D - 785543 / 1             | Experiment ID : 1508NS40              | Test Type : 08 | Units : Molar |
| Report Date : September 22, 2015 | Test Date : August 17, 2015           | QNS :          | MC :          |
| COMI : NV2156                    | Stain Reagent : SRB Dual-Pass Related | SSPL : 0JPC    |               |

| Panel/Cell Line            | Log10 Concentration |       |       |       |       |       |       |      |      |      |      |      |         |           |           |
|----------------------------|---------------------|-------|-------|-------|-------|-------|-------|------|------|------|------|------|---------|-----------|-----------|
|                            | Time Zero           | Ctrl  | -8.0  | -7.0  | -6.0  | -5.0  | -4.0  | -8.0 | -7.0 | -6.0 | -5.0 | -4.0 | GI50    | TGI       | LC50      |
| Leukemia                   |                     |       |       |       |       |       |       |      |      |      |      |      |         |           |           |
| CCRF-CEM                   | 0.775               | 3.093 | 3.018 | 2.952 | 2.903 | 1.284 | 0.846 | 97   | 94   | 92   | 22   | 3    | 3.97E-6 | > 1.00E-4 | > 1.00E-4 |
| HL-60(TB)                  | 0.866               | 3.244 | 3.128 | 2.974 | 2.842 | 0.816 | 0.706 | 95   | 89   | 83   | -6   | -19  | 2.36E-6 | 8.60E-6   | > 1.00E-4 |
| K-562                      | 0.299               | 2.258 | 2.259 | 2.067 | 1.559 | 0.490 | 0.395 | 100  | 90   | 64   | 10   | 5    | 1.83E-6 | > 1.00E-4 | > 1.00E-4 |
| MOLT-4                     | 0.563               | 2.584 | 2.577 | 2.340 | 2.311 | 0.868 | 0.700 | 100  | 88   | 86   | 15   | 7    | 3.24E-6 | > 1.00E-4 | > 1.00E-4 |
| RPMI-8226                  | 0.922               | 2.859 | 2.747 | 2.672 | 2.500 | 1.058 | 0.929 | 94   | 90   | 81   | 7    | .    | 2.65E-6 | > 1.00E-4 | > 1.00E-4 |
| Non-Small Cell Lung Cancer |                     |       |       |       |       |       |       |      |      |      |      |      |         |           |           |
| A549/ATCC                  | 0.557               | 2.319 | 2.320 | 2.241 | 2.094 | 1.136 | 0.907 | 100  | 96   | 87   | 33   | 20   | 4.83E-6 | > 1.00E-4 | > 1.00E-4 |
| EKVX                       | 0.560               | 2.456 | 2.375 | 2.308 | 2.122 | 1.348 | 0.990 | 96   | 92   | 82   | 42   | 23   | 6.22E-6 | > 1.00E-4 | > 1.00E-4 |
| HOP-62                     | 0.812               | 1.984 | 1.933 | 1.836 | 1.820 | 1.232 | 0.894 | 96   | 87   | 86   | 36   | 7    | 5.21E-6 | > 1.00E-4 | > 1.00E-4 |
| HOP-92                     | 1.053               | 1.528 | 1.481 | 1.464 | 1.408 | 1.115 | 0.816 | 90   | 86   | 75   | 13   | -23  | 2.52E-6 | 2.33E-5   | > 1.00E-4 |
| NCI-H226                   | 0.865               | 2.444 | 2.353 | 2.274 | 2.186 | 1.744 | 1.230 | 94   | 89   | 84   | 56   | 23   | 1.49E-5 | > 1.00E-4 | > 1.00E-4 |
| NCI-H23                    | 0.580               | 2.366 | 2.245 | 2.130 | 1.999 | 1.182 | 0.677 | 93   | 87   | 79   | 34   | 5    | 4.40E-6 | > 1.00E-4 | > 1.00E-4 |
| NCI-H322M                  | 0.659               | 2.052 | 1.977 | 1.849 | 1.926 | 1.459 | 0.814 | 95   | 85   | 91   | 57   | 11   | 1.44E-5 | > 1.00E-4 | > 1.00E-4 |
| NCI-H460                   | 0.246               | 2.713 | 2.745 | 2.748 | 2.682 | 0.761 | 0.354 | 101  | 101  | 99   | 21   | 4    | 4.23E-6 | > 1.00E-4 | > 1.00E-4 |
| NCI-H522                   | 0.900               | 1.965 | 1.821 | 1.749 | 1.702 | 0.764 | 0.442 | 86   | 80   | 75   | -15  | -51  | 1.90E-6 | 6.80E-6   | 9.44E-5   |
| Colon Cancer               |                     |       |       |       |       |       |       |      |      |      |      |      |         |           |           |
| COLO 205                   | 0.405               | 1.729 | 1.769 | 1.645 | 1.663 | 1.016 | 0.404 | 103  | 94   | 95   | 46   | .    | 8.35E-6 | 9.82E-5   | > 1.00E-4 |
| HCC-2998                   | 0.560               | 2.350 | 2.354 | 2.263 | 2.301 | 1.619 | 1.050 | 100  | 95   | 97   | 59   | 27   | 1.94E-5 | > 1.00E-4 | > 1.00E-4 |
| HCT-116                    | 0.281               | 2.540 | 2.301 | 2.287 | 2.139 | 0.366 | 0.249 | 89   | 89   | 82   | 4    | -11  | 2.57E-6 | 1.77E-5   | > 1.00E-4 |
| HCT-15                     | 0.234               | 1.994 | 1.940 | 1.837 | 1.560 | 0.558 | 0.337 | 97   | 91   | 75   | 18   | 6    | 2.78E-6 | > 1.00E-4 | > 1.00E-4 |
| HT29                       | 0.203               | 1.314 | 1.214 | 1.236 | 1.148 | 0.213 | 0.152 | 91   | 93   | 85   | 1    | -25  | 2.61E-6 | 1.08E-5   | > 1.00E-4 |
| KM12                       | 0.426               | 2.502 | 2.522 | 2.423 | 2.366 | 1.288 | 0.474 | 101  | 96   | 93   | 41   | 2    | 6.86E-6 | > 1.00E-4 | > 1.00E-4 |
| SW-620                     | 0.269               | 2.109 | 2.065 | 1.960 | 1.941 | 0.507 | 0.311 | 98   | 92   | 91   | 13   | 2    | 3.35E-6 | > 1.00E-4 | > 1.00E-4 |
| CNS Cancer                 |                     |       |       |       |       |       |       |      |      |      |      |      |         |           |           |
| SF-268                     | 0.469               | 1.905 | 1.877 | 1.782 | 1.788 | 1.113 | 0.723 | 98   | 91   | 92   | 45   | 18   | 7.77E-6 | > 1.00E-4 | > 1.00E-4 |
| SF-295                     | 0.632               | 2.292 | 2.241 | 2.177 | 2.064 | 0.783 | 0.459 | 97   | 93   | 86   | 9    | -27  | 2.95E-6 | 1.77E-5   | > 1.00E-4 |
| SF-539                     | 0.835               | 2.531 | 2.554 | 2.362 | 2.342 | 0.815 | 0.377 | 101  | 90   | 89   | -2   | -55  | 2.66E-6 | 9.40E-6   | 8.06E-5   |
| SNB-19                     | 0.604               | 2.047 | 2.002 | 1.869 | 1.842 | 1.001 | 0.598 | 97   | 88   | 86   | 27   | -1   | 4.11E-6 | 9.17E-5   | > 1.00E-4 |
| SNB-75                     | 0.719               | 1.396 | 1.269 | 1.237 | 1.248 | 0.943 | 0.596 | 81   | 77   | 78   | 33   | -17  | 4.21E-6 | 4.55E-5   | > 1.00E-4 |
| U251                       | 0.364               | 1.751 | 1.814 | 1.649 | 1.768 | 0.546 | 0.235 | 105  | 93   | 101  | 13   | -35  | 3.81E-6 | 1.86E-5   | > 1.00E-4 |
| Melanoma                   |                     |       |       |       |       |       |       |      |      |      |      |      |         |           |           |
| LOX IMVI                   | 0.363               | 2.708 | 2.553 | 2.424 | 2.390 | 0.657 | 0.310 | 93   | 88   | 86   | 13   | -15  | 3.11E-6 | 2.90E-5   | > 1.00E-4 |
| MALME-3M                   | 0.779               | 1.492 | 1.436 | 1.368 | 1.402 | 1.065 | 0.849 | 92   | 83   | 87   | 40   | 10   | 6.16E-6 | > 1.00E-4 | > 1.00E-4 |
| M14                        | 0.513               | 2.125 | 2.025 | 1.952 | 1.928 | 0.690 | 0.434 | 94   | 89   | 88   | 11   | -15  | 3.10E-6 | 2.60E-5   | > 1.00E-4 |
| MDA-MB-435                 | 0.432               | 2.331 | 2.274 | 2.167 | 1.356 | 0.289 | 0.199 | 97   | 91   | 49   | -33  | -54  | 9.29E-7 | 3.93E-6   | 6.46E-5   |
| SK-MEL-2                   | 0.988               | 2.330 | 2.189 | 2.061 | 2.133 | 1.107 | 0.750 | 89   | 80   | 85   | 9    | -24  | 2.90E-6 | 1.86E-5   | > 1.00E-4 |
| SK-MEL-28                  | 0.567               | 1.798 | 1.791 | 1.724 | 1.712 | 0.951 | 0.704 | 99   | 94   | 93   | 31   | 11   | 4.97E-6 | > 1.00E-4 | > 1.00E-4 |
| SK-MEL-5                   | 0.529               | 2.912 | 2.884 | 2.723 | 2.323 | 0.535 | 0.269 | 99   | 92   | 75   | .    | -49  | 2.17E-6 | 1.01E-5   | > 1.00E-4 |
| UACC-257                   | 0.903               | 1.943 | 1.924 | 1.796 | 1.843 | 1.434 | 1.099 | 98   | 86   | 90   | 51   | 19   | 1.08E-5 | > 1.00E-4 | > 1.00E-4 |
| UACC-62                    | 0.961               | 2.937 | 2.838 | 2.677 | 2.554 | 0.958 | 0.876 | 95   | 87   | 81   | .    | -9   | 2.39E-6 | 9.91E-6   | > 1.00E-4 |
| Ovarian Cancer             |                     |       |       |       |       |       |       |      |      |      |      |      |         |           |           |
| IGROV1                     | 0.737               | 2.317 | 2.352 | 2.237 | 2.210 | 1.120 | 0.886 | 102  | 95   | 93   | 24   | 9    | 4.23E-6 | > 1.00E-4 | > 1.00E-4 |
| OVCAR-3                    | 0.492               | 1.606 | 1.634 | 1.566 | 1.571 | 0.825 | 0.477 | 102  | 96   | 97   | 30   | -3   | 5.01E-6 | 8.08E-5   | > 1.00E-4 |
| OVCAR-4                    | 0.604               | 1.481 | 1.503 | 1.448 | 1.392 | 1.027 | 0.786 | 102  | 96   | 90   | 48   | 21   | 9.08E-6 | > 1.00E-4 | > 1.00E-4 |
| OVCAR-5                    | 0.567               | 1.556 | 1.516 | 1.464 | 1.457 | 0.885 | 0.500 | 96   | 91   | 90   | 32   | -12  | 4.90E-6 | 5.38E-5   | > 1.00E-4 |
| OVCAR-8                    | 0.454               | 1.993 | 1.976 | 1.895 | 1.887 | 1.184 | 0.487 | 99   | 94   | 93   | 47   | 2    | 8.78E-6 | > 1.00E-4 | > 1.00E-4 |
| NCI/ADR-RES                | 0.357               | 1.667 | 1.612 | 1.548 | 1.456 | 0.644 | 0.438 | 96   | 91   | 84   | 22   | 6    | 3.52E-6 | > 1.00E-4 | > 1.00E-4 |
| SK-OV-3                    | 0.962               | 2.213 | 2.190 | 2.109 | 2.182 | 1.547 | 0.948 | 98   | 92   | 98   | 47   | -1   | 8.62E-6 | 9.33E-5   | > 1.00E-4 |
| Renal Cancer               |                     |       |       |       |       |       |       |      |      |      |      |      |         |           |           |
| 786-0                      | 0.670               | 2.362 | 2.245 | 2.233 | 2.163 | 1.298 | 0.798 | 93   | 92   | 88   | 37   | 8    | 5.59E-6 | > 1.00E-4 | > 1.00E-4 |
| A498                       | 1.356               | 2.016 | 1.754 | 1.718 | 1.635 | 1.332 | 0.942 | 60   | 55   | 42   | -2   | -31  | 2.40E-7 | 9.10E-6   | > 1.00E-4 |
| ACHN                       | 0.336               | 1.472 | 1.521 | 1.414 | 1.391 | 0.958 | 0.581 | 104  | 95   | 93   | 55   | 22   | 1.39E-5 | > 1.00E-4 | > 1.00E-4 |
| CAKI-1                     | 0.325               | 2.155 | 2.135 | 1.952 | 1.991 | 1.287 | 0.480 | 99   | 89   | 91   | 53   | 8    | 1.14E-5 | > 1.00E-4 | > 1.00E-4 |
| RXF 393                    | 0.568               | 1.356 | 1.313 | 1.238 | 1.188 | 0.936 | 0.536 | 95   | 85   | 79   | 47   | -6   | 7.90E-6 | 7.81E-5   | > 1.00E-4 |
| SN12C                      | 0.531               | 2.103 | 2.009 | 1.958 | 1.934 | 1.101 | 0.628 | 94   | 91   | 89   | 36   | 6    | 5.50E-6 | > 1.00E-4 | > 1.00E-4 |
| TK-10                      | 0.856               | 2.673 | 2.609 | 2.573 | 2.608 | 1.144 | 0.686 | 96   | 94   | 96   | 16   | -20  | 3.77E-6 | 2.78E-5   | > 1.00E-4 |
| UO-31                      | 0.686               | 2.380 | 2.215 | 2.007 | 2.006 | 1.310 | 0.947 | 90   | 78   | 78   | 37   | 15   | 4.78E-6 | > 1.00E-4 | > 1.00E-4 |
| Prostate Cancer            |                     |       |       |       |       |       |       |      |      |      |      |      |         |           |           |
| PC-3                       | 0.732               | 2.688 | 2.609 | 2.441 | 2.257 | 1.359 | 0.880 | 96   | 87   | 78   | 32   | 8    | 4.07E-6 | > 1.00E-4 | > 1.00E-4 |
| DU-145                     | 0.332               | 1.733 | 1.786 | 1.680 | 1.622 | 1.150 | 0.487 | 104  | 96   | 92   | 58   | 11   | 1.50E-5 | > 1.00E-4 | > 1.00E-4 |
| Breast Cancer              |                     |       |       |       |       |       |       |      |      |      |      |      |         |           |           |
| MCF7                       | 0.406               | 2.684 | 2.453 | 2.383 | 2.299 | 0.893 | 0.700 | 90   | 87   | 83   | 21   | 13   | 3.44E-6 | > 1.00E-4 | > 1.00E-4 |
| MDA-MB-231/ATCC            | 0.541               | 1.490 | 1.467 | 1.395 | 1.351 | 0.751 | 0.473 | 98   | 90   | 85   | 22   | -13  | 3.62E-6 | 4.34E-5   | > 1.00E-4 |
| HS 578T                    | 0.766               | 1.821 | 1.755 | 1.645 | 1.651 | 1.024 | 0.677 | 94   | 83   | 84   | 24   | -12  | 3.71E-6 | 4.75E-5   | > 1.00E-4 |
| BT-549                     | 0.905               | 1.857 | 1.833 | 1.712 | 1.674 | 1.041 | 0.801 | 97   | 85   | 81   | 14   | -12  | 2.90E-6 | 3.57E-5   | > 1.00E-4 |
| T-47D                      | 0.504               | 1.153 | 1.110 | 1.059 | 1.036 | 0.654 | 0.493 | 93   | 85   | 82   | 23   | -2   | 3.48E-6 | 8.13E-5   | > 1.00E-4 |
| MDA-MB-468                 | 0.652               | 1.619 | 1.498 | 1.451 | 1.422 | 0.798 | 0.526 | 87   | 83   | 80   | 15   | -19  | 2.88E-6 | 2.75E-5   | > 1.00E-4 |

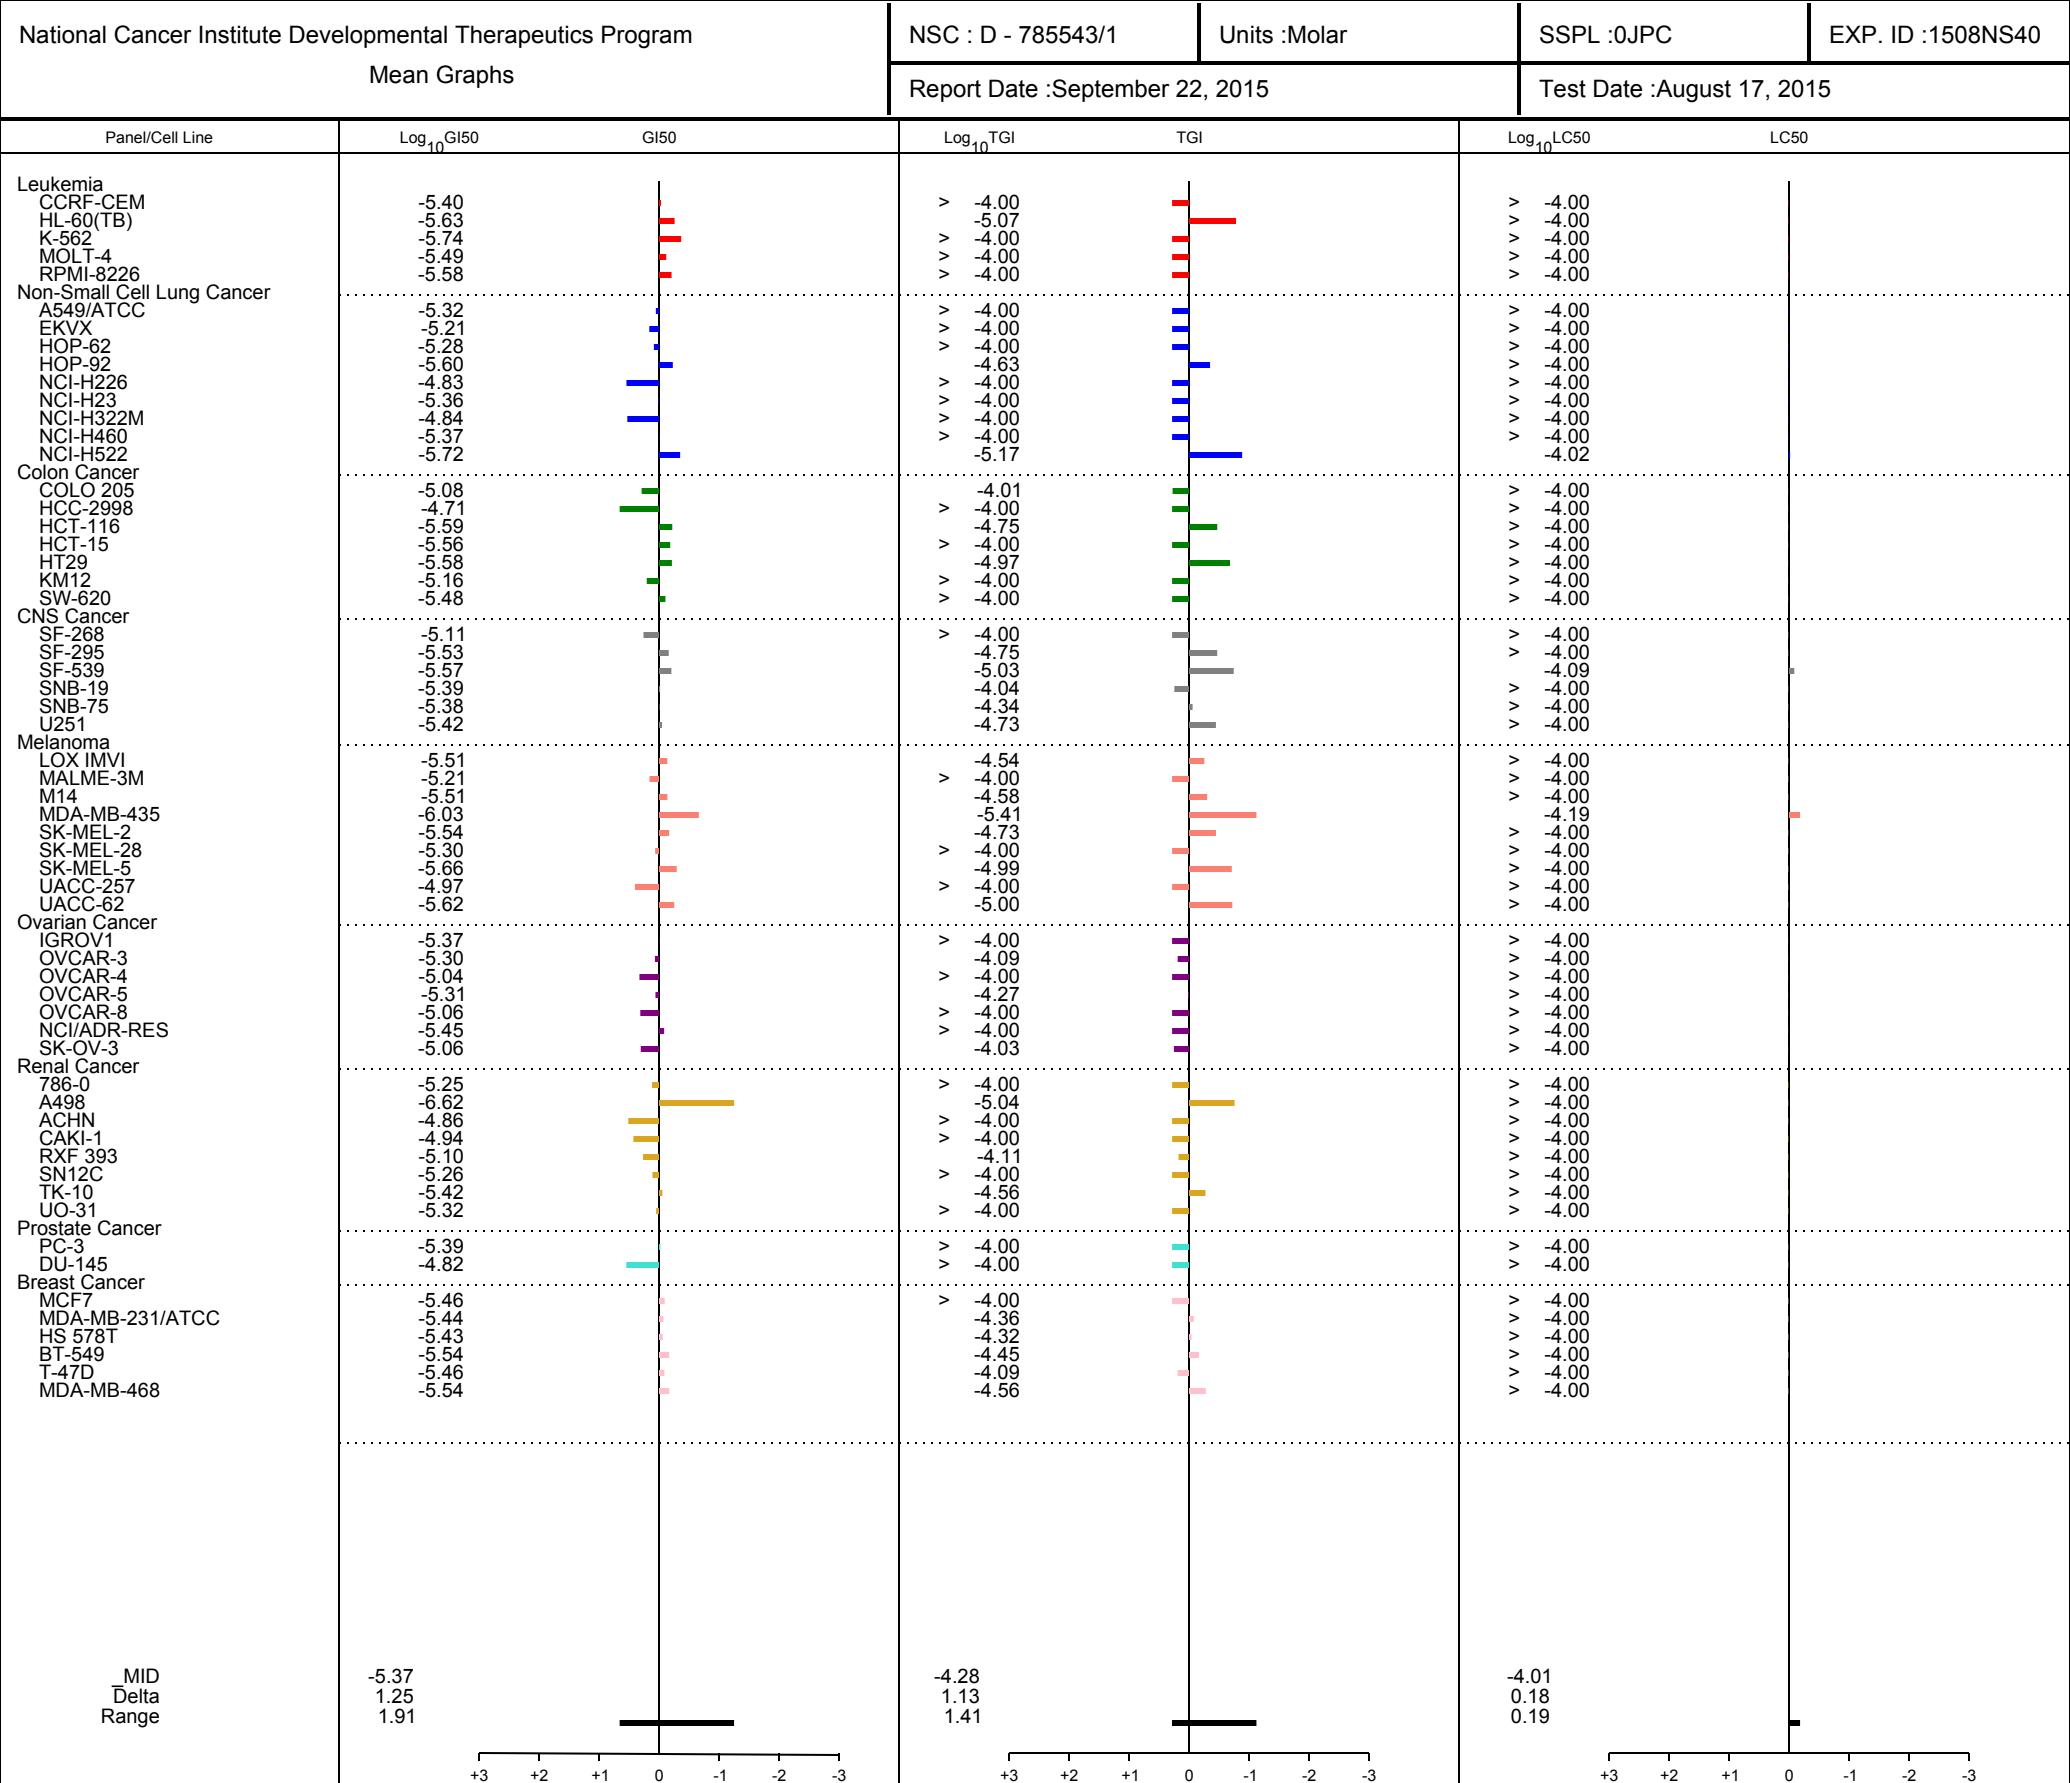

Dose Response Curves

Report Date:September 22, 2015

Test Date:August 17, 2015

All Cell Lines

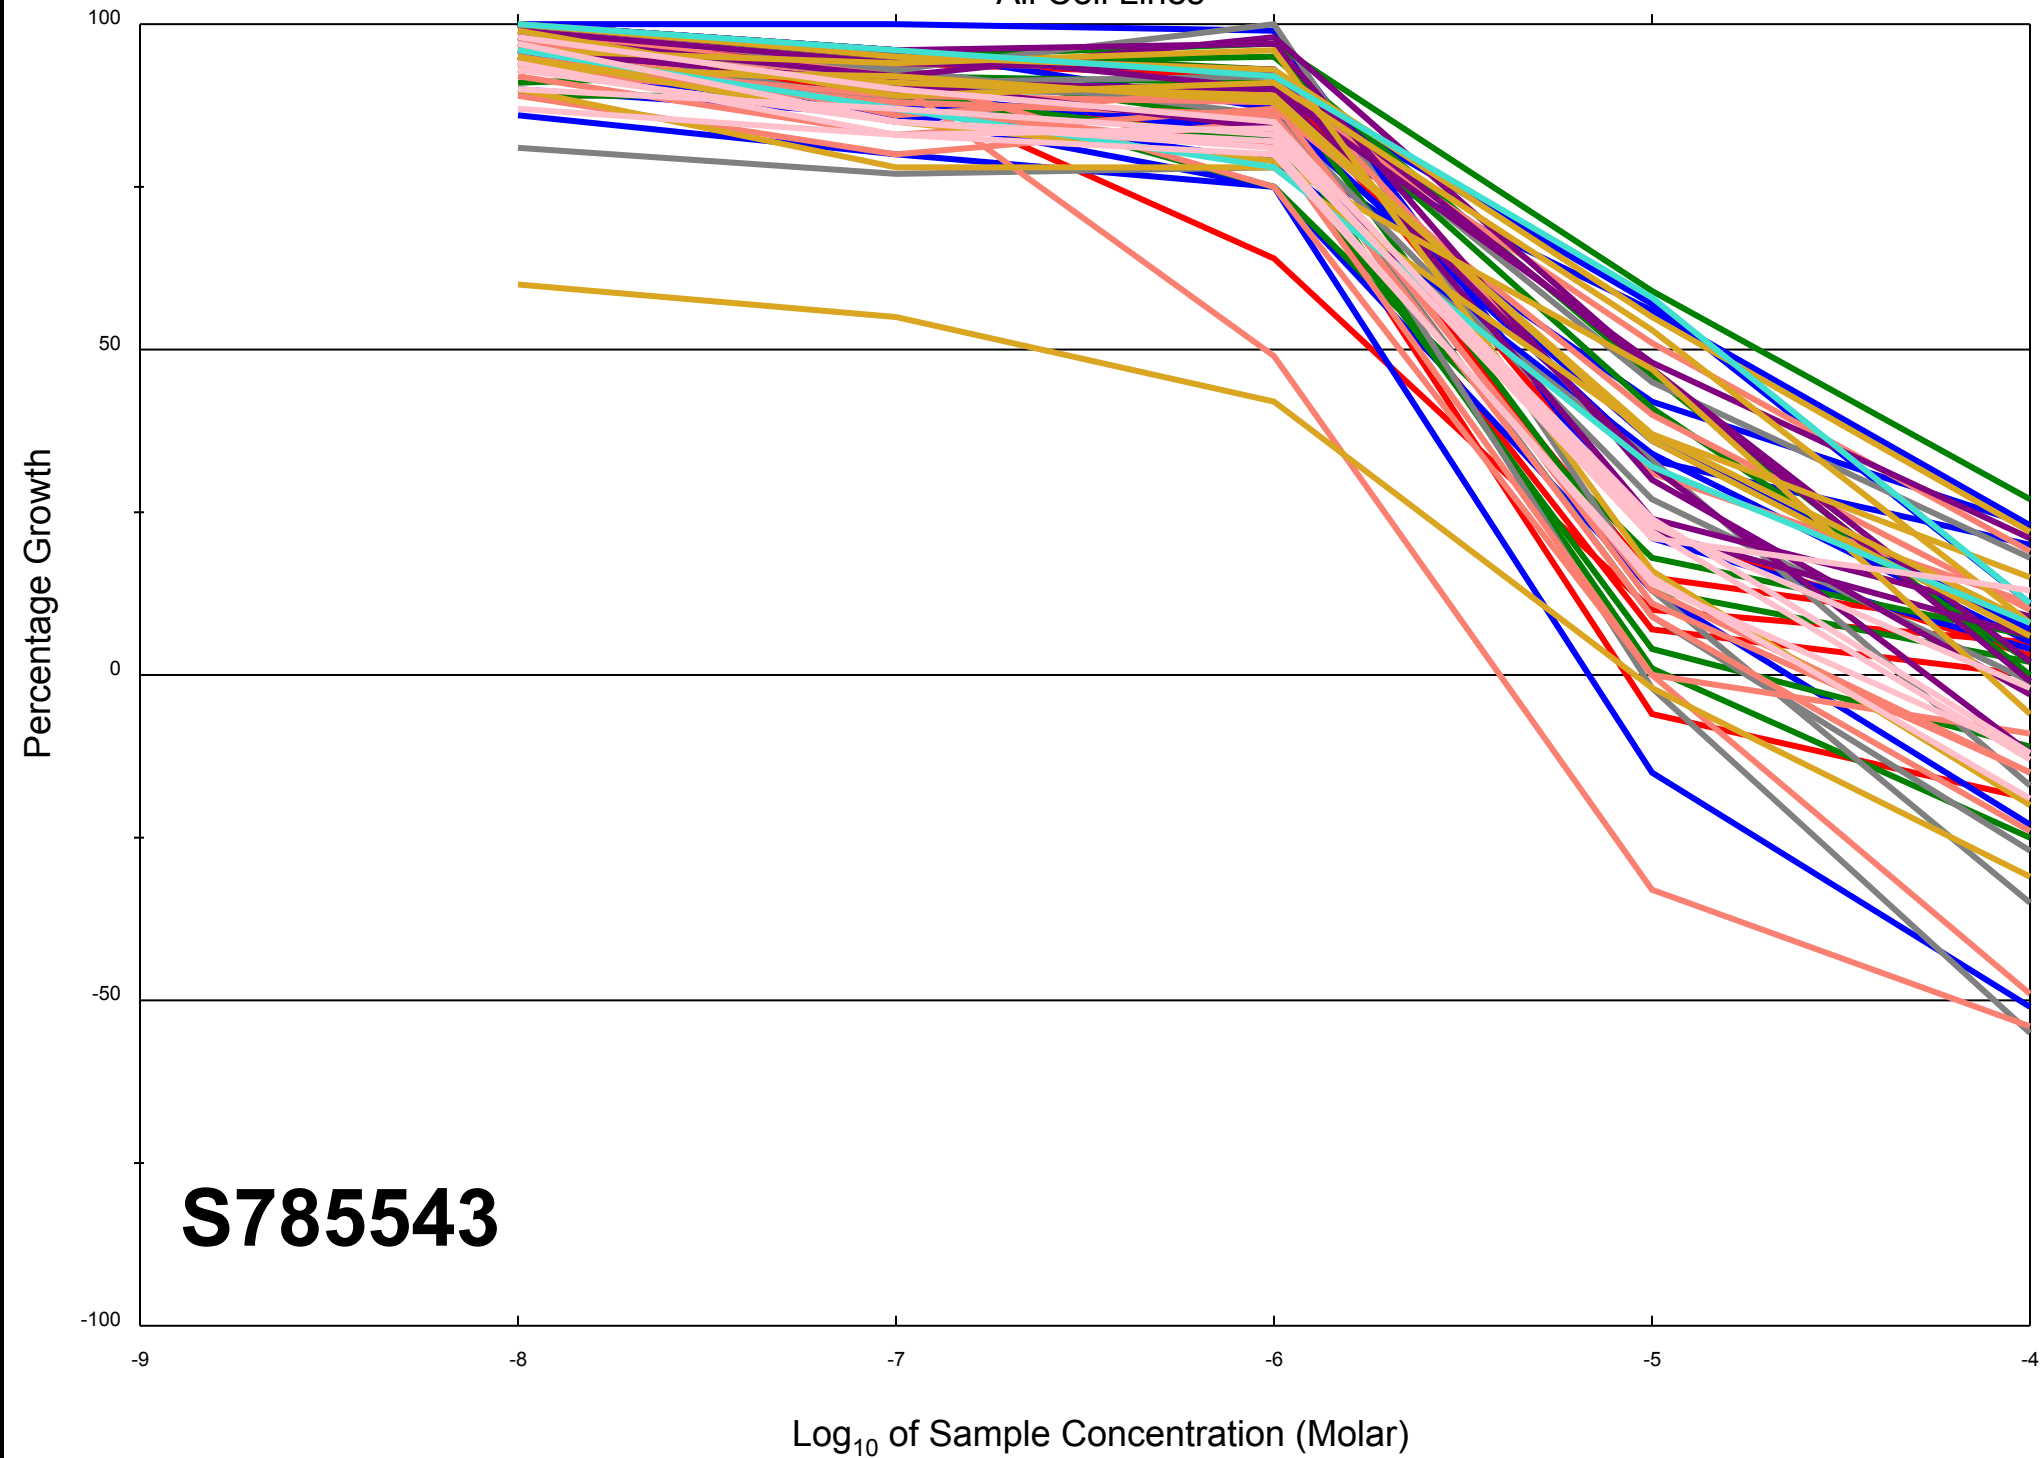

Supplement: s1 [file s1]
