# Supplementary material for: Antiproliferative Activity Predictor: A New Reliable In Silico Tool for Drug Response Prediction against NCI60 Panel
Source: MDPI journal article supplement (doi:10.3390/ijms232214374), 2022-11-19

Leukemia

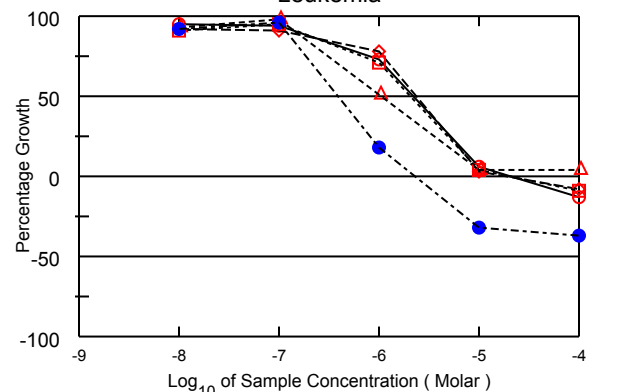

Non-Small Cell Lung Cancer

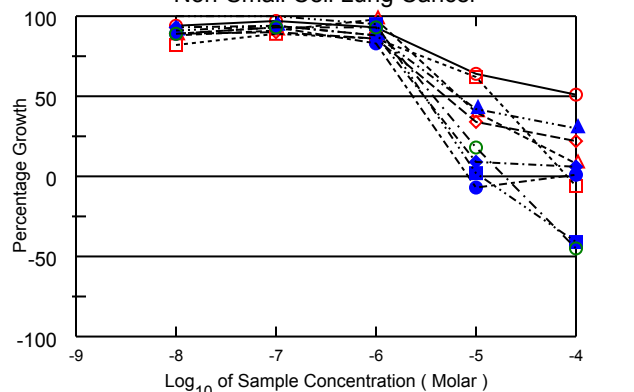

Colon Cancer

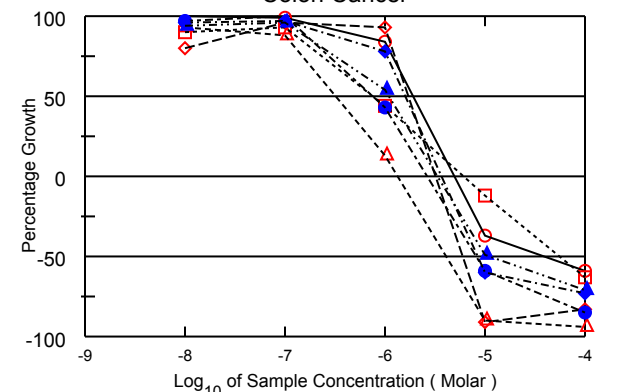

CNS Cancer

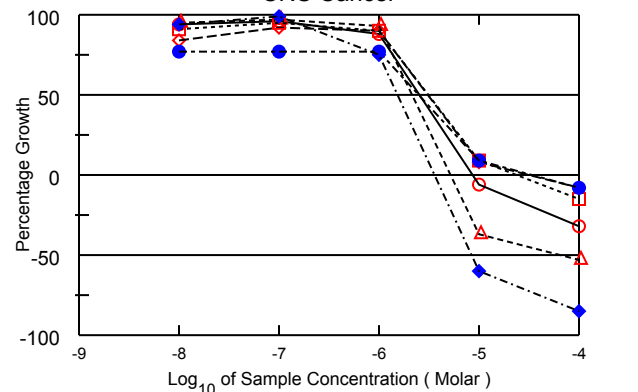

Melanoma

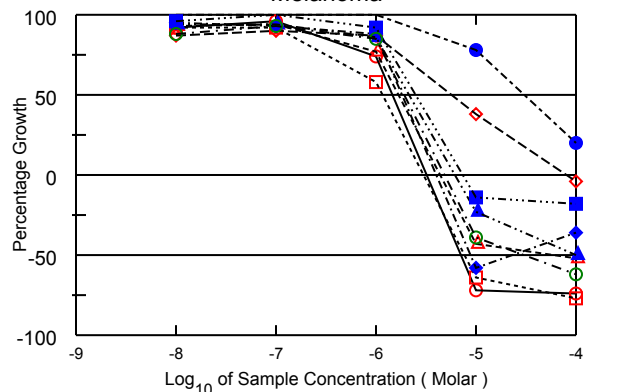

Ovarian Cancer

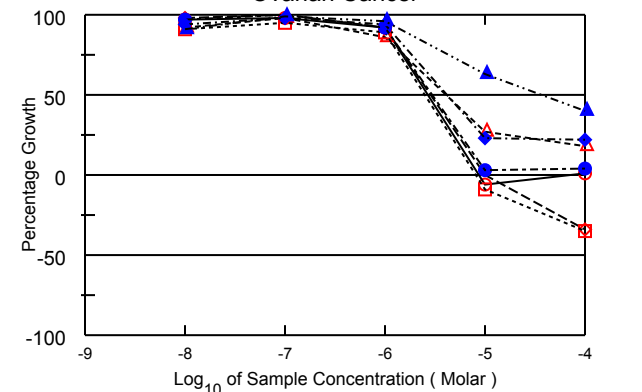

Renal Cancer

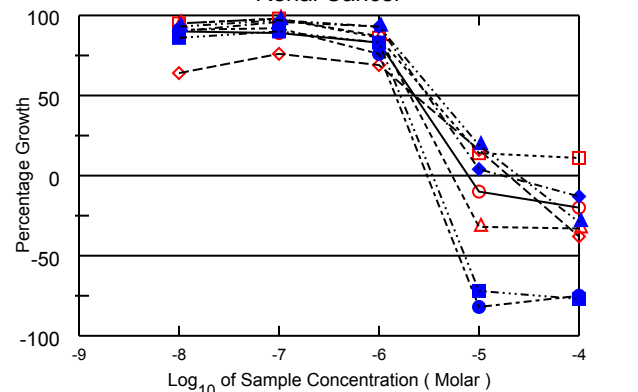

Prostate Cancer

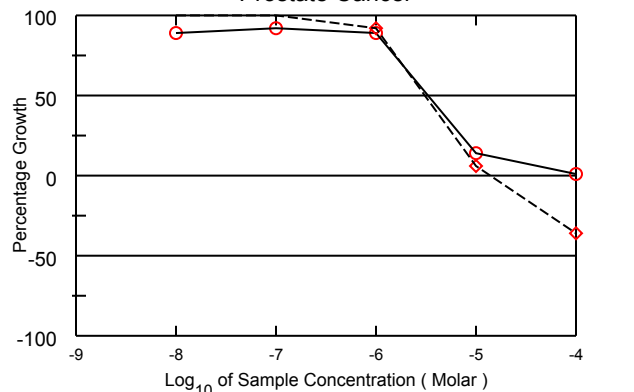

Breast Cancer

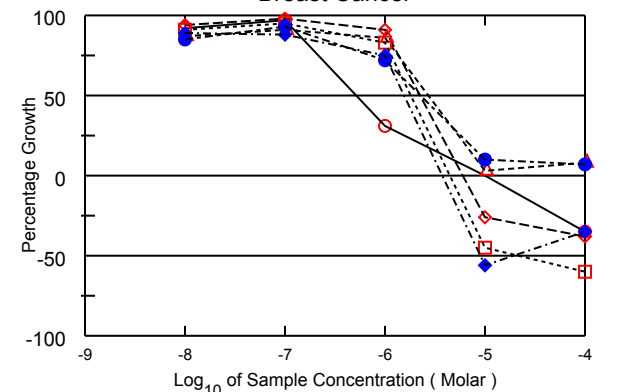

National Cancer Institute Developmental Therapeutics Program  
In-Vitro Testing Results

|                                  |                                       |                |               |
|----------------------------------|---------------------------------------|----------------|---------------|
| NSC : D - 785541 / 1             | Experiment ID : 1508NS40              | Test Type : 08 | Units : Molar |
| Report Date : September 22, 2015 | Test Date : August 17, 2015           | QNS :          | MC :          |
| COMI : NV1994                    | Stain Reagent : SRB Dual-Pass Related | SSPL : 0JPC    |               |

| Panel/Cell Line            | Log10 Concentration |       |       |       |       |       |       |      |      |      |      |      |           |           |           |
|----------------------------|---------------------|-------|-------|-------|-------|-------|-------|------|------|------|------|------|-----------|-----------|-----------|
|                            | Time Zero           | Ctrl  | -8.0  | -7.0  | -6.0  | -5.0  | -4.0  | -8.0 | -7.0 | -6.0 | -5.0 | -4.0 | GI50      | TGI       | LC50      |
| Leukemia                   |                     |       |       |       |       |       |       |      |      |      |      |      |           |           |           |
| CCRF-CEM                   | 0.775               | 3.093 | 2.968 | 2.959 | 2.477 | 0.909 | 0.671 | 95   | 94   | 73   | 6    | -13  | 2.22E-6   | 2.00E-5   | > 1.00E-4 |
| HL-60(TB)                  | 0.866               | 3.244 | 3.051 | 3.037 | 2.729 | 0.926 | 0.793 | 92   | 91   | 78   | 3    | -8   | 2.36E-6   | 1.69E-5   | > 1.00E-4 |
| K-562                      | 0.299               | 2.258 | 2.120 | 2.220 | 1.306 | 0.383 | 0.370 | 93   | 98   | 51   | 4    | 4    | 1.07E-6   | > 1.00E-4 | > 1.00E-4 |
| MOLT-4                     | 0.563               | 2.584 | 2.409 | 2.492 | 2.001 | 0.638 | 0.511 | 91   | 95   | 71   | 4    | -9   | 2.06E-6   | 1.93E-5   | > 1.00E-4 |
| RPMI-8226                  | 0.922               | 2.859 | 2.700 | 2.774 | 1.278 | 0.630 | 0.578 | 92   | 96   | 18   | -32  | -37  | 3.89E-7   | 2.33E-6   | > 1.00E-4 |
| Non-Small Cell Lung Cancer |                     |       |       |       |       |       |       |      |      |      |      |      |           |           |           |
| A549/ATCC                  | 0.557               | 2.319 | 2.212 | 2.271 | 2.199 | 1.687 | 1.461 | 94   | 97   | 93   | 64   | 51   | > 1.00E-4 | > 1.00E-4 | > 1.00E-4 |
| EKVX                       | 0.560               | 2.456 | 2.251 | 2.275 | 2.195 | 1.212 | 0.986 | 89   | 90   | 86   | 34   | 22   | 5.00E-6   | > 1.00E-4 | > 1.00E-4 |
| HOP-62                     | 0.812               | 1.984 | 1.841 | 1.877 | 1.959 | 1.285 | 0.903 | 88   | 91   | 98   | 40   | 8    | 6.80E-6   | > 1.00E-4 | > 1.00E-4 |
| HOP-92                     | 1.053               | 1.528 | 1.444 | 1.475 | 1.460 | 1.348 | 0.995 | 82   | 89   | 86   | 62   | -6   | 1.51E-5   | 8.28E-5   | > 1.00E-4 |
| NCI-H226                   | 0.865               | 2.444 | 2.276 | 2.330 | 2.183 | 0.801 | 0.885 | 89   | 93   | 83   | -7   | 1    | 2.33E-6   | .         | > 1.00E-4 |
| NCI-H23                    | 0.580               | 2.366 | 2.235 | 2.260 | 2.144 | 0.734 | 0.686 | 93   | 94   | 88   | 9    | 6    | 2.99E-6   | > 1.00E-4 | > 1.00E-4 |
| NCI-H322M                  | 0.659               | 2.052 | 1.928 | 1.971 | 1.886 | 1.244 | 1.076 | 91   | 94   | 88   | 42   | 30   | 6.69E-6   | > 1.00E-4 | > 1.00E-4 |
| NCI-H460                   | 0.246               | 2.713 | 2.714 | 2.731 | 2.594 | 0.300 | 0.144 | 100  | 101  | 95   | 2    | -41  | 3.06E-6   | 1.12E-5   | > 1.00E-4 |
| NCI-H522                   | 0.900               | 1.965 | 1.845 | 1.889 | 1.894 | 1.090 | 0.497 | 89   | 93   | 93   | 18   | -45  | 3.75E-6   | 1.93E-5   | > 1.00E-4 |
| Colon Cancer               |                     |       |       |       |       |       |       |      |      |      |      |      |           |           |           |
| COLO 205                   | 0.405               | 1.729 | 1.731 | 1.715 | 1.513 | 0.256 | 0.167 | 100  | 99   | 84   | -37  | -59  | 1.90E-6   | 4.95E-6   | 3.96E-5   |
| HCC-2998                   | 0.560               | 2.350 | 1.995 | 2.279 | 2.228 | 0.051 | 0.095 | 80   | 96   | 93   | -91  | -83  | 1.72E-6   | 3.21E-6   | 6.00E-6   |
| HCT-116                    | 0.281               | 2.540 | 2.382 | 2.267 | 0.565 | 0.030 | 0.018 | 93   | 88   | 13   | -90  | -94  | 3.19E-7   | 1.33E-6   | 4.10E-6   |
| HCT-15                     | 0.234               | 1.994 | 1.812 | 1.870 | 1.017 | 0.207 | 0.088 | 90   | 93   | 44   | -12  | -63  | 7.69E-7   | 6.18E-6   | 5.65E-5   |
| HT29                       | 0.203               | 1.314 | 1.285 | 1.373 | 0.677 | 0.083 | 0.031 | 97   | 105  | 43   | -59  | -85  | 7.63E-7   | 2.62E-6   | 8.14E-6   |
| KM12                       | 0.426               | 2.502 | 2.416 | 2.449 | 2.050 | 0.170 | 0.117 | 96   | 97   | 78   | -60  | -73  | 1.60E-6   | 3.67E-6   | 8.44E-6   |
| SW-620                     | 0.269               | 2.109 | 1.991 | 2.036 | 1.254 | 0.136 | 0.078 | 94   | 96   | 54   | -49  | -71  | 1.08E-6   | 3.31E-6   | 1.06E-5   |
| CNS Cancer                 |                     |       |       |       |       |       |       |      |      |      |      |      |           |           |           |
| SF-268                     | 0.469               | 1.905 | 1.822 | 1.842 | 1.734 | 0.440 | 0.317 | 94   | 96   | 88   | -6   | -32  | 2.53E-6   | 8.58E-6   | > 1.00E-4 |
| SF-295                     | 0.632               | 2.292 | 2.032 | 2.157 | 2.118 | 0.763 | 0.581 | 84   | 92   | 90   | 8    | -8   | 3.05E-6   | 3.12E-5   | > 1.00E-4 |
| SF-539                     | 0.835               | 2.531 | 2.444 | 2.474 | 2.409 | 0.523 | 0.389 | 95   | 97   | 93   | -37  | -53  | 2.13E-6   | 5.16E-6   | 6.09E-5   |
| SNB-19                     | 0.604               | 2.047 | 1.922 | 1.971 | 1.904 | 0.730 | 0.514 | 91   | 95   | 90   | 9    | -15  | 3.11E-6   | 2.33E-5   | > 1.00E-4 |
| SNB-75                     | 0.719               | 1.396 | 1.239 | 1.242 | 1.241 | 0.777 | 0.665 | 77   | 77   | 77   | 9    | -8   | 2.49E-6   | 3.39E-5   | > 1.00E-4 |
| U251                       | 0.364               | 1.751 | 1.673 | 1.732 | 1.405 | 0.146 | 0.056 | 94   | 99   | 75   | -60  | -85  | 1.53E-6   | 3.60E-6   | 8.45E-6   |
| Melanoma                   |                     |       |       |       |       |       |       |      |      |      |      |      |           |           |           |
| LOX IMVI                   | 0.363               | 2.708 | 2.528 | 2.610 | 2.099 | 0.101 | 0.095 | 92   | 96   | 74   | -72  | -74  | 1.46E-6   | 3.21E-6   | 7.04E-6   |
| MALME-3M                   | 0.779               | 1.492 | 1.398 | 1.423 | 1.400 | 1.053 | 0.745 | 87   | 90   | 87   | 38   | -4   | 5.77E-6   | 7.88E-5   | > 1.00E-4 |
| M14                        | 0.513               | 2.125 | 2.019 | 2.029 | 1.762 | 0.293 | 0.245 | 93   | 94   | 77   | -43  | -52  | 1.69E-6   | 4.40E-6   | 5.73E-5   |
| MDA-MB-435                 | 0.432               | 2.331 | 2.179 | 2.186 | 1.527 | 0.157 | 0.099 | 92   | 92   | 58   | -64  | -77  | 1.16E-6   | 2.98E-6   | 7.70E-6   |
| SK-MEL-2                   | 0.988               | 2.330 | 2.359 | 2.422 | 2.340 | 2.035 | 1.261 | 102  | 107  | 101  | 78   | 20   | 3.06E-5   | > 1.00E-4 | > 1.00E-4 |
| SK-MEL-28                  | 0.567               | 1.798 | 1.733 | 1.714 | 1.654 | 0.240 | 0.362 | 95   | 93   | 88   | -58  | -36  | 1.83E-6   | 4.02E-6   | .         |
| SK-MEL-5                   | 0.529               | 2.912 | 2.771 | 2.763 | 2.575 | 0.408 | 0.265 | 94   | 94   | 86   | -23  | -50  | 2.14E-6   | 6.15E-6   | > 1.00E-4 |
| UACC-257                   | 0.903               | 1.943 | 1.897 | 1.989 | 1.858 | 0.775 | 0.739 | 96   | 104  | 92   | -14  | -18  | 2.48E-6   | 7.34E-6   | > 1.00E-4 |
| UACC-62                    | 0.961               | 2.937 | 2.697 | 2.791 | 2.644 | 0.589 | 0.363 | 88   | 93   | 85   | -39  | -62  | 1.92E-6   | 4.87E-6   | 3.01E-5   |
| Ovarian Cancer             |                     |       |       |       |       |       |       |      |      |      |      |      |           |           |           |
| IGROV1                     | 0.737               | 2.317 | 2.274 | 2.292 | 2.192 | 0.691 | 0.750 | 97   | 98   | 92   | -6   | 1    | 2.68E-6   | .         | > 1.00E-4 |
| OVCAR-3                    | 0.492               | 1.606 | 1.583 | 1.616 | 1.515 | 0.490 | 0.323 | 98   | 101  | 92   | .    | -34  | 2.84E-6   | 9.90E-6   | > 1.00E-4 |
| OVCAR-4                    | 0.604               | 1.481 | 1.407 | 1.460 | 1.358 | 0.841 | 0.762 | 92   | 98   | 86   | 27   | 18   | 4.07E-6   | > 1.00E-4 | > 1.00E-4 |
| OVCAR-5                    | 0.567               | 1.556 | 1.470 | 1.505 | 1.447 | 0.516 | 0.371 | 91   | 95   | 89   | -9   | -35  | 2.50E-6   | 8.08E-6   | > 1.00E-4 |
| OVCAR-8                    | 0.454               | 1.993 | 1.942 | 2.007 | 1.874 | 0.499 | 0.518 | 97   | 101  | 92   | 3    | 4    | 2.97E-6   | > 1.00E-4 | > 1.00E-4 |
| NCI/ADR-RES                | 0.357               | 1.667 | 1.593 | 1.647 | 1.587 | 0.665 | 0.651 | 94   | 98   | 94   | 23   | 22   | 4.20E-6   | > 1.00E-4 | > 1.00E-4 |
| SK-OV-3                    | 0.962               | 2.213 | 2.102 | 2.195 | 2.168 | 1.750 | 1.460 | 91   | 99   | 96   | 63   | 40   | 3.64E-5   | > 1.00E-4 | > 1.00E-4 |
| Renal Cancer               |                     |       |       |       |       |       |       |      |      |      |      |      |           |           |           |
| 786-0                      | 0.670               | 2.362 | 2.195 | 2.182 | 2.079 | 0.606 | 0.536 | 90   | 89   | 83   | -10  | -20  | 2.28E-6   | 7.88E-6   | > 1.00E-4 |
| A498                       | 1.356               | 2.016 | 1.780 | 1.860 | 1.809 | 1.463 | 0.841 | 64   | 76   | 69   | 16   | -38  | 2.26E-6   | 1.99E-5   | > 1.00E-4 |
| ACHN                       | 0.336               | 1.472 | 1.420 | 1.446 | 1.327 | 0.229 | 0.225 | 95   | 98   | 87   | -32  | -33  | 2.05E-6   | 5.40E-6   | > 1.00E-4 |
| CAKI-1                     | 0.325               | 2.155 | 2.062 | 2.113 | 1.902 | 0.580 | 0.528 | 95   | 98   | 86   | 14   | 11   | 3.17E-6   | > 1.00E-4 | > 1.00E-4 |
| RXF 393                    | 0.568               | 1.356 | 1.287 | 1.295 | 1.168 | 0.104 | 0.144 | 91   | 92   | 76   | -82  | -75  | 1.46E-6   | 3.04E-6   | 6.30E-6   |
| SN12C                      | 0.531               | 2.103 | 1.953 | 2.040 | 1.998 | 0.597 | 0.464 | 90   | 96   | 93   | 4    | -13  | 3.06E-6   | 1.77E-5   | > 1.00E-4 |
| TK-10                      | 0.856               | 2.673 | 2.547 | 2.625 | 2.549 | 1.206 | 0.607 | 93   | 97   | 93   | 19   | -29  | 3.83E-6   | 2.50E-5   | > 1.00E-4 |
| UO-31                      | 0.686               | 2.380 | 2.140 | 2.205 | 2.088 | 0.189 | 0.155 | 86   | 90   | 83   | -72  | -77  | 1.63E-6   | 3.41E-6   | 7.17E-6   |
| Prostate Cancer            |                     |       |       |       |       |       |       |      |      |      |      |      |           |           |           |
| PC-3                       | 0.732               | 2.688 | 2.482 | 2.540 | 2.473 | 1.001 | 0.759 | 89   | 92   | 89   | 14   | 1    | 3.30E-6   | > 1.00E-4 | > 1.00E-4 |
| DU-145                     | 0.332               | 1.733 | 1.743 | 1.743 | 1.617 | 0.422 | 0.213 | 101  | 101  | 92   | 6    | -36  | 3.08E-6   | 1.42E-5   | > 1.00E-4 |
| Breast Cancer              |                     |       |       |       |       |       |       |      |      |      |      |      |           |           |           |
| MCF7                       | 0.406               | 2.684 | 2.509 | 2.620 | 1.112 | 0.403 | 0.264 | 92   | 97   | 31   | .    | -35  | 5.16E-7   | 9.48E-6   | > 1.00E-4 |
| MDA-MB-231/ATCC            | 0.541               | 1.490 | 1.437 | 1.475 | 1.409 | 0.400 | 0.336 | 94   | 98   | 91   | -26  | -38  | 2.25E-6   | 6.00E-6   | > 1.00E-4 |
| HS 578T                    | 0.766               | 1.821 | 1.685 | 1.727 | 1.672 | 0.797 | 0.855 | 87   | 91   | 86   | 3    | 8    | 2.71E-6   | > 1.00E-4 | > 1.00E-4 |
| BT-549                     | 0.905               | 1.857 | 1.772 | 1.814 | 1.693 | 0.499 | 0.363 | 91   | 95   | 83   | -45  | -60  | 1.81E-6   | 4.45E-6   | 2.18E-5   |
| T-47D                      | 0.504               | 1.153 | 1.054 | 1.108 | 0.972 | 0.568 | 0.551 | 85   | 93   | 72   | 10   | 7    | 2.26E-6   | > 1.00E-4 | > 1.00E-4 |
| MDA-MB-468                 | 0.652               | 1.619 | 1.511 | 1.507 | 1.375 | 0.287 | 0.425 | 89   | 88   | 75   | -56  | -35  | 1.55E-6   | 3.73E-6   | .         |

| National Cancer Institute Developmental Therapeutics Program |                        | NSC : D - 785541/1              |                       | Units :Molar |                        | SSPL :0JPC                 |  | EXP. ID :1508NS40 |  |
|--------------------------------------------------------------|------------------------|---------------------------------|-----------------------|--------------|------------------------|----------------------------|--|-------------------|--|
| Mean Graphs                                                  |                        | Report Date :September 22, 2015 |                       |              |                        | Test Date :August 17, 2015 |  |                   |  |
| Panel/Cell Line                                              | Log <sub>10</sub> GI50 | GI50                            | Log <sub>10</sub> TGI | TGI          | Log <sub>10</sub> LC50 | LC50                       |  |                   |  |
| Leukemia                                                     |                        |                                 |                       |              |                        |                            |  |                   |  |
| CCRF-CEM                                                     | -5.65                  |                                 | -4.70                 |              | > -4.00                |                            |  |                   |  |
| HL-60(TB)                                                    | -5.63                  |                                 | -4.77                 |              | > -4.00                |                            |  |                   |  |
| K-562                                                        | -5.97                  |                                 | > -4.00               |              | > -4.00                |                            |  |                   |  |
| MOLT-4                                                       | -5.69                  |                                 | -4.72                 |              | > -4.00                |                            |  |                   |  |
| RPMI-8226                                                    | -6.41                  |                                 | -5.63                 |              | > -4.00                |                            |  |                   |  |
| Non-Small Cell Lung Cancer                                   |                        |                                 |                       |              |                        |                            |  |                   |  |
| A549/ATCC                                                    | > -4.00                |                                 | > -4.00               |              | > -4.00                |                            |  |                   |  |
| EKVX                                                         | -5.30                  |                                 | > -4.00               |              | > -4.00                |                            |  |                   |  |
| HOP-62                                                       | -5.17                  |                                 | > -4.00               |              | > -4.00                |                            |  |                   |  |
| HOP-92                                                       | -4.82                  |                                 | -4.08                 |              | > -4.00                |                            |  |                   |  |
| NCI-H226                                                     | -5.63                  |                                 |                       |              | > -4.00                |                            |  |                   |  |
| NCI-H23                                                      | -5.52                  |                                 | > -4.00               |              | > -4.00                |                            |  |                   |  |
| NCI-H322M                                                    | -5.17                  |                                 | > -4.00               |              | > -4.00                |                            |  |                   |  |
| NCI-H460                                                     | -5.51                  |                                 | -4.95                 |              | > -4.00                |                            |  |                   |  |
| NCI-H522                                                     | -5.43                  |                                 | -4.72                 |              | > -4.00                |                            |  |                   |  |
| Colon Cancer                                                 |                        |                                 |                       |              |                        |                            |  |                   |  |
| COLO 205                                                     | -5.72                  |                                 | -5.31                 |              | -4.40                  |                            |  |                   |  |
| HCC-2998                                                     | -5.77                  |                                 | -5.49                 |              | -5.22                  |                            |  |                   |  |
| HCT-116                                                      | -6.50                  |                                 | -5.88                 |              | -5.39                  |                            |  |                   |  |
| HCT-15                                                       | -6.11                  |                                 | -5.21                 |              | -4.25                  |                            |  |                   |  |
| HT29                                                         | -6.12                  |                                 | -5.58                 |              | -5.09                  |                            |  |                   |  |
| KM12                                                         | -5.80                  |                                 | -5.43                 |              | -5.07                  |                            |  |                   |  |
| SW-620                                                       | -5.97                  |                                 | -5.48                 |              | -4.97                  |                            |  |                   |  |
| CNS Cancer                                                   |                        |                                 |                       |              |                        |                            |  |                   |  |
| SF-268                                                       | -5.60                  |                                 | -5.07                 |              | > -4.00                |                            |  |                   |  |
| SF-295                                                       | -5.52                  |                                 | -4.51                 |              | > -4.00                |                            |  |                   |  |
| SF-539                                                       | -5.67                  |                                 | -5.29                 |              | -4.22                  |                            |  |                   |  |
| SNB-19                                                       | -5.51                  |                                 | -4.63                 |              | > -4.00                |                            |  |                   |  |
| SNB-75                                                       | -5.60                  |                                 | -4.47                 |              | > -4.00                |                            |  |                   |  |
| U251                                                         | -5.81                  |                                 | -5.44                 |              | -5.07                  |                            |  |                   |  |
| Melanoma                                                     |                        |                                 |                       |              |                        |                            |  |                   |  |
| LOX IMVI                                                     | -5.84                  |                                 | -5.49                 |              | -5.15                  |                            |  |                   |  |
| MALME-3M                                                     | -5.24                  |                                 | -4.10                 |              | > -4.00                |                            |  |                   |  |
| M14                                                          | -5.77                  |                                 | -5.36                 |              | -4.24                  |                            |  |                   |  |
| MDA-MB-435                                                   | -5.94                  |                                 | -5.53                 |              | -5.11                  |                            |  |                   |  |
| SK-MEL-2                                                     | -4.51                  |                                 | > -4.00               |              | > -4.00                |                            |  |                   |  |
| SK-MEL-28                                                    | -5.74                  |                                 | -5.40                 |              |                        |                            |  |                   |  |
| SK-MEL-5                                                     | -5.67                  |                                 | -5.21                 |              | > -4.00                |                            |  |                   |  |
| UACC-257                                                     | -5.61                  |                                 | -5.13                 |              | > -4.00                |                            |  |                   |  |
| UACC-62                                                      | -5.72                  |                                 | -5.31                 |              | -4.52                  |                            |  |                   |  |
| Ovarian Cancer                                               |                        |                                 |                       |              |                        |                            |  |                   |  |
| IGROV1                                                       | -5.57                  |                                 |                       |              | > -4.00                |                            |  |                   |  |
| OVCAR-3                                                      | -5.55                  |                                 | -5.00                 |              | > -4.00                |                            |  |                   |  |
| OVCAR-4                                                      | -5.39                  |                                 | > -4.00               |              | > -4.00                |                            |  |                   |  |
| OVCAR-5                                                      | -5.60                  |                                 | -5.09                 |              | > -4.00                |                            |  |                   |  |
| OVCAR-8                                                      | -5.53                  |                                 | > -4.00               |              | > -4.00                |                            |  |                   |  |
| NCI/ADR-RES                                                  | -5.38                  |                                 | > -4.00               |              | > -4.00                |                            |  |                   |  |
| SK-OV-3                                                      | -4.44                  |                                 | > -4.00               |              | > -4.00                |                            |  |                   |  |
| Renal Cancer                                                 |                        |                                 |                       |              |                        |                            |  |                   |  |
| 786-0                                                        | -5.64                  |                                 | -5.10                 |              | > -4.00                |                            |  |                   |  |
| A498                                                         | -5.65                  |                                 | -4.70                 |              | > -4.00                |                            |  |                   |  |
| ACHN                                                         | -5.69                  |                                 | -5.27                 |              | > -4.00                |                            |  |                   |  |
| CAKI-1                                                       | -5.50                  |                                 | > -4.00               |              | > -4.00                |                            |  |                   |  |
| RXF 393                                                      | -5.83                  |                                 | -5.52                 |              | -5.20                  |                            |  |                   |  |
| SN12C                                                        | -5.51                  |                                 | -4.75                 |              | > -4.00                |                            |  |                   |  |
| TK-10                                                        | -5.42                  |                                 | -4.60                 |              | > -4.00                |                            |  |                   |  |
| UO-31                                                        | -5.79                  |                                 | -5.47                 |              | -5.14                  |                            |  |                   |  |
| Prostate Cancer                                              |                        |                                 |                       |              |                        |                            |  |                   |  |
| PC-3                                                         | -5.48                  |                                 | > -4.00               |              | > -4.00                |                            |  |                   |  |
| DU-145                                                       | -5.51                  |                                 | -4.85                 |              | > -4.00                |                            |  |                   |  |
| Breast Cancer                                                |                        |                                 |                       |              |                        |                            |  |                   |  |
| MCF7                                                         | -6.29                  |                                 | -5.02                 |              | > -4.00                |                            |  |                   |  |
| MDA-MB-231/ATCC                                              | -5.65                  |                                 | -5.22                 |              | > -4.00                |                            |  |                   |  |
| HS 578T                                                      | -5.57                  |                                 | > -4.00               |              | > -4.00                |                            |  |                   |  |
| BT-549                                                       | -5.74                  |                                 | -5.35                 |              | -4.66                  |                            |  |                   |  |
| T-47D                                                        | -5.65                  |                                 | > -4.00               |              | > -4.00                |                            |  |                   |  |
| MDA-MB-468                                                   | -5.81                  |                                 | -5.43                 |              |                        |                            |  |                   |  |
|                                                              |                        |                                 |                       |              |                        |                            |  |                   |  |
|                                                              |                        |                                 |                       |              |                        |                            |  |                   |  |
|                                                              |                        |                                 |                       |              |                        |                            |  |                   |  |
|                                                              |                        |                                 |                       |              |                        |                            |  |                   |  |
|                                                              |                        |                                 |                       |              |                        |                            |  |                   |  |
|                                                              |                        |                                 |                       |              |                        |                            |  |                   |  |
|                                                              |                        |                                 |                       |              |                        |                            |  |                   |  |
|                                                              |                        |                                 |                       |              |                        |                            |  |                   |  |
|                                                              |                        |                                 |                       |              |                        |                            |  |                   |  |
|                                                              |                        |                                 |                       |              |                        |                            |  |                   |  |
|                                                              |                        |                                 |                       |              |                        |                            |  |                   |  |
|                                                              |                        |                                 |                       |              |                        |                            |  |                   |  |
|                                                              |                        |                                 |                       |              |                        |                            |  |                   |  |
|                                                              |                        |                                 |                       |              |                        |                            |  |                   |  |
|                                                              |                        |                                 |                       |              |                        |                            |  |                   |  |
|                                                              |                        |                                 |                       |              |                        |                            |  |                   |  |
|                                                              |                        |                                 |                       |              |                        |                            |  |                   |  |
|                                                              |                        |                                 |                       |              |                        |                            |  |                   |  |
|                                                              |                        |                                 |                       |              |                        |                            |  |                   |  |
|                                                              |                        |                                 |                       |              |                        |                            |  |                   |  |
|                                                              |                        |                                 |                       |              |                        |                            |  |                   |  |
|                                                              |                        |                                 |                       |              |                        |                            |  |                   |  |
|                                                              |                        |                                 |                       |              |                        |                            |  |                   |  |
|                                                              |                        |                                 |                       |              |                        |                            |  |                   |  |
|                                                              |                        |                                 |                       |              |                        |                            |  |                   |  |
|                                                              |                        |                                 |                       |              |                        |                            |  |                   |  |
|                                                              |                        |                                 |                       |              |                        |                            |  |                   |  |
|                                                              |                        |                                 |                       |              |                        |                            |  |                   |  |
|                                                              |                        |                                 |                       |              |                        |                            |  |                   |  |
|                                                              |                        |                                 |                       |              |                        |                            |  |                   |  |
|                                                              |                        |                                 |                       |              |                        |                            |  |                   |  |
|                                                              |                        |                                 |                       |              |                        |                            |  |                   |  |
|                                                              |                        |                                 |                       |              |                        |                            |  |                   |  |
|                                                              |                        |                                 |                       |              |                        |                            |  |                   |  |
|                                                              |                        |                                 |                       |              |                        |                            |  |                   |  |
|                                                              |                        |                                 |                       |              |                        |                            |  |                   |  |
|                                                              |                        |                                 |                       |              |                        |                            |  |                   |  |
|                                                              |                        |                                 |                       |              |                        |                            |  |                   |  |
|                                                              |                        |                                 |                       |              |                        |                            |  |                   |  |
|                                                              |                        |                                 |                       |              |                        |                            |  |                   |  |
|                                                              |                        |                                 |                       |              |                        |                            |  |                   |  |
|                                                              |                        |                                 |                       |              |                        |                            |  |                   |  |
|                                                              |                        |                                 |                       |              |                        |                            |  |                   |  |
|                                                              |                        |                                 |                       |              |                        |                            |  |                   |  |
|                                                              |                        |                                 |                       |              |                        |                            |  |                   |  |
|                                                              |                        |                                 |                       |              |                        |                            |  |                   |  |
|                                                              |                        |                                 |                       |              |                        |                            |  |                   |  |
|                                                              |                        |                                 |                       |              |                        |                            |  |                   |  |
|                                                              |                        |                                 |                       |              |                        |                            |  |                   |  |
|                                                              |                        |                                 |                       |              |                        |                            |  |                   |  |
|                                                              |                        |                                 |                       |              |                        |                            |  |                   |  |
|                                                              |                        |                                 |                       |              |                        |                            |  |                   |  |
|                                                              |                        |                                 |                       |              |                        |                            |  |                   |  |
|                                                              |                        |                                 |                       |              |                        |                            |  |                   |  |
|                                                              |                        |                                 |                       |              |                        |                            |  |                   |  |

## Dose Response Curves

Report Date:September 22, 2015

Test Date:August 17, 2015

## All Cell Lines

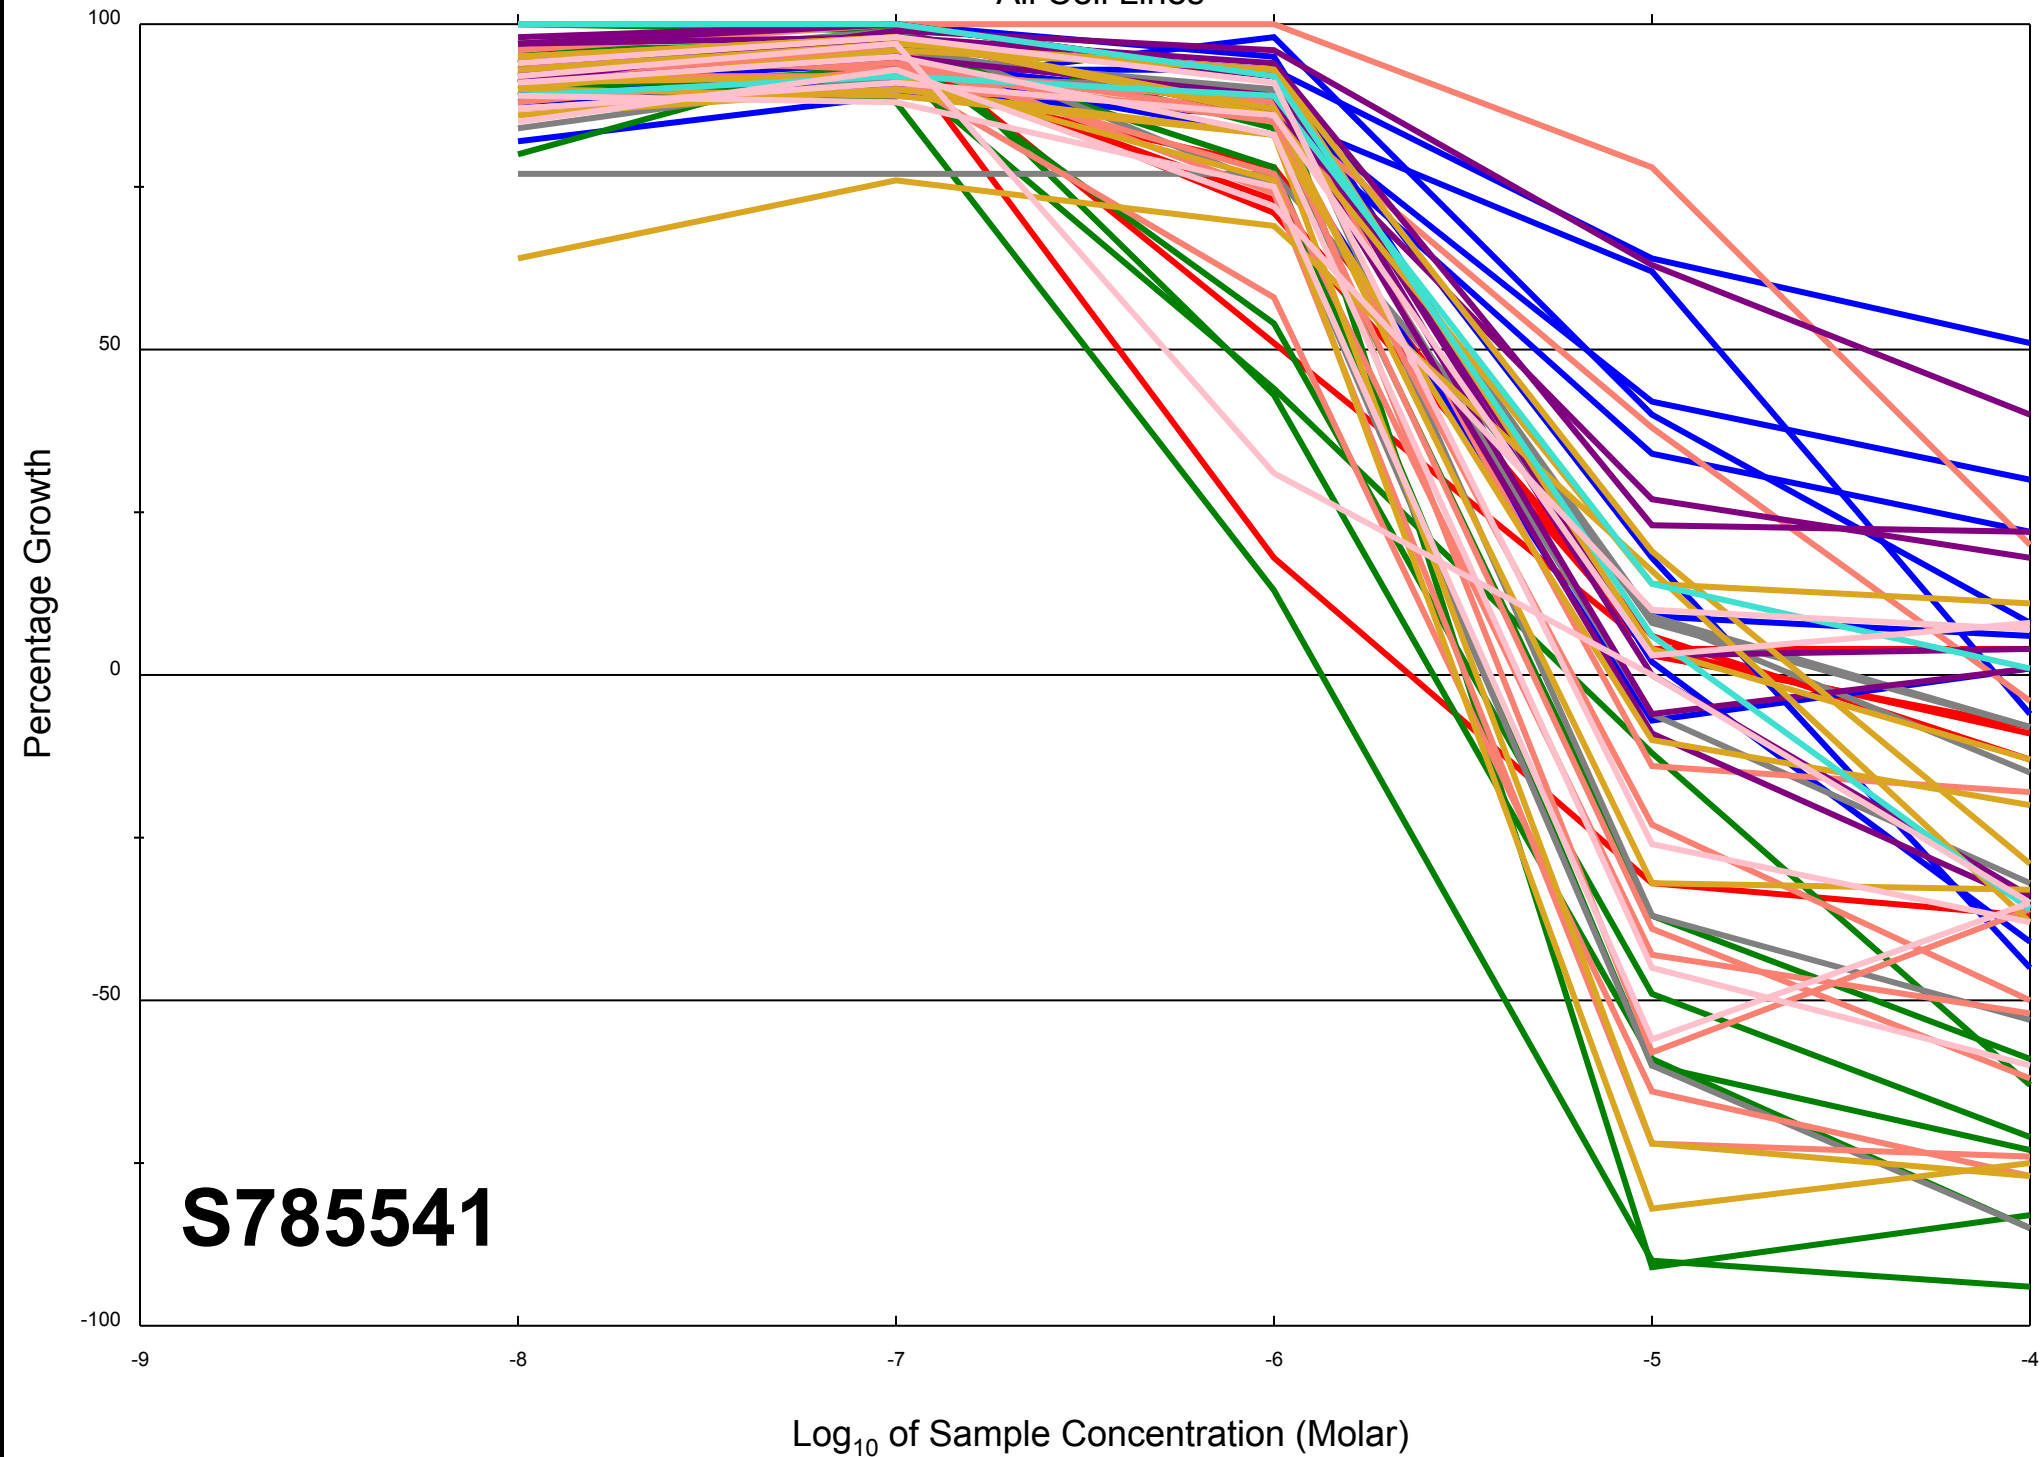

Supplement: s1 [file s1]
