# Supplementary material for: Antiproliferative Activity Predictor: A New Reliable In Silico Tool for Drug Response Prediction against NCI60 Panel
Source: MDPI journal article supplement (doi:10.3390/ijms232214374), 2022-11-19
Supplement: s1 [file s1]

| MOL_DES_ID | name                            |
|------------|---------------------------------|
| 1000000    | Total number of atoms           |
| 2000000    | Number of C atoms               |
| 3000000    | Number of H atoms               |
| 4000000    | Number of O atoms               |
| 5000000    | Number of N atoms               |
| 6000000    | Number of S atoms               |
| 7000000    | Number of F atoms               |
| 8000000    | Number of Cl atoms              |
| 9000000    | Number of Br atoms              |
| 10000000   | Number of I atoms               |
| 11000000   | Number of P atoms               |
| 12000000   | Number of other atoms           |
| 13000000   | Relative number of C atoms      |
| 14000000   | Relative number of H atoms      |
| 15000000   | Relative number of O atoms      |
| 16000000   | Relative number of N atoms      |
| 17000000   | Relative number of S atoms      |
| 18000000   | Relative number of F atoms      |
| 19000000   | Relative number of Cl atoms     |
| 20000000   | Relative number of Br atoms     |
| 21000000   | Relative number of I atoms      |
| 22000000   | Relative number of P atoms      |
| 23000000   | Relative number of others atoms |
| 24000000   | Total number of bonds           |
| 25000000   | Number of single bonds          |
| 26000000   | Relative number of single bonds |
| 27000000   | Number of double bonds          |
| 28000000   | Relative number of double bonds |

|          |                                                     |
|----------|-----------------------------------------------------|
| 29000000 | Number of triple bonds                              |
| 30000000 | Relative number of triple bonds                     |
| 31000000 | Number of aromatic bonds                            |
| 32000000 | Relative number of aromatic bonds                   |
| 33000000 | Number of Aromatic Atoms                            |
| 34000000 | Relative Number of Aromatic Atoms                   |
| 35000000 | Number of rings                                     |
| 35000000 | Number of rings                                     |
| 36000000 | Relative number of rings                            |
| 36000000 | Relative number of rings                            |
| 37000000 | Number of benzene rings                             |
| 38000000 | Molecular weight                                    |
| 39000000 | Average atom weight                                 |
| 40000000 | Wiener index                                        |
| 41000000 | weiner polarity number                              |
| 42000000 | Randic index (order 0)                              |
| 43000000 | Kier&Hall index (order 0)                           |
| 44000000 | Randic index (order 1)                              |
| 45000000 | Randic index (order 2)                              |
| 46000000 | Randic index (order 3)                              |
| 47000000 | Kier&Hall index (order 1)                           |
| 48000000 | Kier&Hall index (order 2)                           |
| 49000000 | Kier&Hall index (order 3)                           |
| 50000000 | Information content (order 0)                       |
| 51000000 | Average Information content (order 0)               |
| 52000000 | Structural Information content (order 0)            |
| 53000000 | Average Structural Information content (order 0)    |
| 54000000 | Complementary Information content (order 0)         |
| 55000000 | Average Complementary Information content (order 0) |

|          |                                                     |
|----------|-----------------------------------------------------|
| 56000000 | Bonding Information content (order 0)               |
| 57000000 | Average Bonding Information content (order 0)       |
| 58000000 | Average Information content (order 1)               |
| 59000000 | Information content (order 1)                       |
| 60000000 | Average Structural Information content (order 1)    |
| 61000000 | Structural Information content (order 1)            |
| 62000000 | Average Complementary Information content (order 1) |
| 63000000 | Complementary Information content (order 1)         |
| 64000000 | Bonding Information content (order 1)               |
| 65000000 | Average Bonding Information content (order 1)       |
| 66000000 | Average Information content (order 2)               |
| 67000000 | Information content (order 2)                       |
| 68000000 | Average Structural Information content (order 2)    |
| 69000000 | Structural Information content (order 2)            |
| 70000000 | Average Complementary Information content (order 2) |
| 71000000 | Complementary Information content (order 2)         |
| 72000000 | Bonding Information content (order 2)               |
| 73000000 | Average Bonding Information content (order 2)       |
| 74000000 | AIC3                                                |
| 75000000 | IC3                                                 |
| 76000000 | ASIC3                                               |
| 77000000 | SIC3                                                |
| 78000000 | ACIC3                                               |
| 79000000 | CIC3                                                |
| 80000000 | BIC3                                                |
| 81000000 | ABIC3                                               |
| 82000000 | Balaban index                                       |
| 83000000 | Kier shape index (order 1)                          |
| 84000000 | Kier shape index (order 2)                          |

|           |                                    |
|-----------|------------------------------------|
| 85000000  | Kier shape index (order 3)         |
| 86000000  | Kier flexibility index             |
| 87000000  | Gravitation index (all bonds)      |
| 88000000  | Gravitational Index Heavy atoms    |
| 89000000  | SQRGravitational Index Heavy atoms |
| 90000000  | CRGravitational Index Heavy atoms  |
| 91000000  | SQRGravitational Index             |
| 92000000  | CRGravitational Index              |
| 93000000  | Gravitational Index all pairs      |
| 94000000  | Gravitational Index all pairs2     |
| 95000000  | Gravitational Index all pairs3     |
| 96000000  | Momento di inerzia A-codessastyle  |
| 97000000  | Momento di inerzia B-codessastyle  |
| 98000000  | Momento di inerzia C-codessastyle  |
| 99000000  | Moments of inertia A               |
| 100000000 | Moments of inertia B               |
| 101000000 | Moments of inertia C               |
| 109000000 | Molecular volume                   |
| 110000000 | Acidic Group                       |
| 111000000 | Sum atoms polarizabilities         |
| 112000000 | AutoCorrelationCharge1             |
| 113000000 | AutoCorrelationCharge2             |
| 114000000 | AutoCorrelationCharge3             |
| 115000000 | AutoCorrelationCharge4             |
| 116000000 | AutoCorrelationCharge5             |
| 117000000 | AutoCorrelationMass1               |
| 118000000 | AutoCorrelationMass2               |
| 119000000 | AutoCorrelationMass3               |
| 120000000 | AutoCorrelationMass4               |

|           |                                                  |
|-----------|--------------------------------------------------|
| 121000000 | AutoCorrelationMass5                             |
| 122000000 | AutoCorrelationPolarizzability1                  |
| 123000000 | AutoCorrelationPolarizzability2                  |
| 124000000 | AutoCorrelationPolarizzability3                  |
| 125000000 | AutoCorrelationPolarizzability4                  |
| 126000000 | AutoCorrelationPolarizzability5                  |
| 127000000 | Basic Group                                      |
| 128000000 | nhigh lowest atom weighted BCUTS                 |
| 129000000 | nlow highest atom weighted BCUTS                 |
| 130000000 | nhigh lowest partial charge weighted BCUTS       |
| 131000000 | nlow highest partial charge weighted BCUTS       |
| 132000000 | nhigh lowest polarizability weighted BCUTS       |
| 133000000 | nlow highest polarizability weighted BCUTS       |
| 134000000 | BPOL                                             |
| 135000000 | CarbonType-C1SP1                                 |
| 136000000 | CarbonType-C2SP1                                 |
| 137000000 | CarbonType-C1SP2                                 |
| 138000000 | CarbonType-C2SP2                                 |
| 139000000 | CarbonType-C3SP2                                 |
| 140000000 | CarbonType-C1SP3                                 |
| 141000000 | CarbonType-C2SP3                                 |
| 142000000 | CarbonType-C3SP3                                 |
| 143000000 | CarbonType-C4SP3                                 |
| 144000000 | PPSA1 Partial positive surface area (Zefirov PC) |
| 145000000 | PPSA2 Total charge weighted PPSA (Zefirov PC)    |
| 146000000 | PPSA3 Atomic charge weighted PPSA (Zefirov PC)   |
| 147000000 | PNSA1 Partial negative surface area (Zefirov PC) |
| 148000000 | PNSA2 Total charge weighted PNSA (Zefirov PC)    |
| 149000000 | PNSA3 Atomic charge weighted PNSA (Zefirov PC)   |

|           |                                                              |
|-----------|--------------------------------------------------------------|
| 150000000 | DPSA1 Difference in CPSAs (PPSA1-PNSA1) (Zefirov PC)         |
| 151000000 | DPSA2 Difference in CPSAs (PPSA2-PNSA2) (Zefirov PC)         |
| 152000000 | DPSA3 Difference in CPSAs (PPSA3-PNSA3) (Zefirov PC)         |
| 153000000 | FPSA1 Fractional PPSA (PPSA-1/TMSA) (Zefirov PC)             |
| 154000000 | FPSA2 Fractional PPSA (PPSA-2/TMSA) (Zefirov PC)             |
| 155000000 | FPSA3 Fractional PPSA (PPSA-3/TMSA) (Zefirov PC)             |
| 156000000 | FNSA1 Fractional PNSA (PNSA-1/TMSA) (Zefirov PC)             |
| 157000000 | FNSA2 Fractional PNSA (PNSA-2/TMSA) (Zefirov PC)             |
| 158000000 | FNSA3 Fractional PNSA (PNSA-3/TMSA) (Zefirov PC)             |
| 159000000 | WPSA1 Weighted PPSA (PPSA1*TMSA/1000) (Zefirov PC)           |
| 160000000 | WPSA2 Weighted PPSA (PPSA2*TMSA/1000) (Zefirov PC)           |
| 161000000 | WPSA3 Weighted PPSA (PPSA3*TMSA/1000) (Zefirov PC)           |
| 162000000 | WNSA1 Weighted PNSA (PNSA1*TMSA/1000) (Zefirov PC)           |
| 163000000 | WNSA2 Weighted PNSA (PNSA2*TMSA/1000) (Zefirov PC)           |
| 164000000 | WNSA3 Weighted PNSA (PNSA3*TMSA/1000) (Zefirov PC)           |
| 165000000 | RPCG Relative positive charge (QMPOS/QTPLUS) (Zefirov PC)    |
| 166000000 | RPCS Relative positive charged SA (SAMPOS*RPCG) (Zefirov PC) |
| 166000000 | RPCS Relative positive charged SA (SAMPOS*RPCG) (Zefirov PC) |
| 167000000 | RNCS Relative negative charged SA (SAMNEG*RNCG) (Zefirov PC) |
| 168000000 | THSA                                                         |
| 169000000 | TPSA                                                         |
| 170000000 | RHSA                                                         |
| 171000000 | RPSA                                                         |
| 172000000 | Max partial charge (Zefirov) for atoms for atom H            |
| 173000000 | Max partial charge (Zefirov) for atoms for atom C            |
| 174000000 | Min partial charge (Zefirov) for atoms for atom H            |
| 175000000 | Min partial charge (Zefirov) for atoms for atom C            |
| 176000000 | Max partial charge (Zefirov) for all atom types              |
| 177000000 | Min partial charge (Zefirov) for all atom types              |

|           |                                                 |
|-----------|-------------------------------------------------|
| 178000000 | Polarity parameter (Zefirov)                    |
| 179000000 | HA dependent HDSA-1 (Zefirov PC)                |
| 180000000 | HA dependent HDSA-1/TMSA (Zefirov PC)           |
| 181000000 | HASA-1 (Zefirov PC)                             |
| 182000000 | HASA-1/TMSA (Zefirov PC)                        |
| 183000000 | HA dependent HDSA-2 (Zefirov PC)                |
| 184000000 | HA dependent HDSA-2/TMSA (Zefirov PC)           |
| 185000000 | HA dependent HDSA-2/SQRT(TMSA) (Zefirov PC)     |
| 186000000 | HA dependent HDCA-1 (Zefirov PC)                |
| 187000000 | HA dependent HDCA-1/TMSA (Zefirov PC)           |
| 188000000 | HA dependent HDCA-2 (Zefirov PC)                |
| 189000000 | HA dependent HDCA-2/TMSA (Zefirov PC)           |
| 190000000 | HA dependent HDCA-2/SQRT(TMSA) (Zefirov PC)     |
| 191000000 | HASA-2 (Zefirov PC)                             |
| 192000000 | HASA-2/TMSA (Zefirov PC)                        |
| 193000000 | HASA-2/SQRT(TMSA) (Zefirov PC)                  |
| 194000000 | HACA-1 (Zefirov PC)                             |
| 195000000 | HACA-1/TMSA (Zefirov PC)                        |
| 196000000 | HACA-2 (Zefirov PC)                             |
| 197000000 | HACA-2/TMSA (Zefirov PC)                        |
| 198000000 | HACA-2/SQRT(TMSA) (Zefirov PC)                  |
| 199000000 | Tot point-charge comp. of the molecular dipole  |
| 200000000 | Tot hybridization comp. of the molecular dipole |
| 201000000 | Tot dipole of the molecule                      |
| 202000000 | Tot molecular 1-center E-N attraction           |
| 203000000 | Tot molecular 1-center E-E repulsion            |
| 204000000 | Tot molecular 2-center resonance energy         |
| 205000000 | Tot molecular 2-center exchange energy          |
| 206000000 | EXCHANGE + RESONANCE ENERGY                     |

|           |                                                                               |
|-----------|-------------------------------------------------------------------------------|
| 207000000 | ELECTRON-ELECTRON REPULSION                                                   |
| 208000000 | ELECTRON-NUCLEAR ATTRACTION                                                   |
| 209000000 | NUCLEAR-NUCLEAR REPULSION                                                     |
| 210000000 | TOTAL ELECTROSTATIC INTERACTION                                               |
| 211000000 | GRAND TOTAL OF TWO-CENTER TERMS                                               |
| 212000000 | ETOT (EONE + ETWO)                                                            |
| 213000000 | Principal moment of inertia A                                                 |
| 214000000 | Relative principal moment of inertia A                                        |
| 215000000 | Principal moment of inertia B                                                 |
| 216000000 | Relative principal moment of inertia B                                        |
| 217000000 | Principal moment of inertia C                                                 |
| 218000000 | Relative principal moment of inertia C                                        |
| 219000000 | Principal moment of inertia A IN UNITS OF $10^{**}(-40)*\text{GRAM-CM}^{**2}$ |
| 220000000 | Relative moment of inertia A IN UNITS OF $10^{**}(-40)*\text{GRAM-CM}^{**2}$  |
| 221000000 | Principal moment of inertia B IN UNITS OF $10^{**}(-40)*\text{GRAM-CM}^{**2}$ |
| 222000000 | Relative moment of inertia B IN UNITS OF $10^{**}(-40)*\text{GRAM-CM}^{**2}$  |
| 223000000 | Principal moment of inertia C IN UNITS OF $10^{**}(-40)*\text{GRAM-CM}^{**2}$ |
| 224000000 | Relative moment of inertia C IN UNITS OF $10^{**}(-40)*\text{GRAM-CM}^{**2}$  |
| 225000000 | ENERGY OF "REORIENTED" SYSTEM WITHOUT FIELD                                   |
| 226000000 | PPSA-1 Partial positive surface area (MOPAC PC)                               |
| 227000000 | PPSA-2 Total charge weighted PPSA (MOPAC PC)                                  |
| 228000000 | PPSA-3 Atomic charge weighted PPSA (MOPAC PC)                                 |
| 229000000 | PNSA-1 Partial negative surface area (MOPAC PC)                               |
| 230000000 | PNSA-2 Total charge weighted PNSA (MOPAC PC)                                  |
| 231000000 | PNSA-3 Atomic charge weighted PNSA (MOPAC PC)                                 |
| 232000000 | DPSA-1 Difference in CPSAs (PPSA1-PNSA1) (MOPAC PC)                           |
| 233000000 | DPSA-2 Difference in CPSAs (PPSA2-PNSA2) (MOPAC PC)                           |
| 234000000 | DPSA-3 Difference in CPSAs (PPSA3-PNSA3) (MOPAC PC)                           |
| 235000000 | FPSA-1 Fractional PPSA (PPSA-1/TMSA) (MOPAC PC)                               |



|           |                                                            |
|-----------|------------------------------------------------------------|
| 236000000 | FP5A-2 Fractional PPSA (PPSA-2/TMSA) (MOPAC PC)            |
| 237000000 | FP5A-3 Fractional PPSA (PPSA-3/TMSA) (MOPAC PC)            |
| 238000000 | FNSA-1 Fractional PNSA (PNSA-1/TMSA) (MOPAC PC)            |
| 239000000 | FNSA-2 Fractional PNSA (PNSA-2/TMSA) (MOPAC PC)            |
| 240000000 | FNSA-3 Fractional PNSA (PNSA-3/TMSA) (MOPAC PC)            |
| 241000000 | WPSA-1 Weighted PPSA (PPSA1*TMSA/1000) (MOPAC PC)          |
| 242000000 | WPSA-2 Weighted PPSA (PPSA2*TMSA/1000) (MOPAC PC)          |
| 243000000 | WPSA-3 Weighted PPSA (PPSA3*TMSA/1000) (MOPAC PC)          |
| 244000000 | WNSA-1 Weighted PNSA (PNSA1*TMSA/1000) (MOPAC PC)          |
| 245000000 | WNSA-2 Weighted PNSA (PNSA2*TMSA/1000) (MOPAC PC)          |
| 246000000 | WNSA-3 Weighted PNSA (PNSA3*TMSA/1000) (MOPAC PC)          |
| 247000000 | RPCG Relative positive charge (QMPOS/QTPLUS) (MOPAC PC)    |
| 248000000 | RNCG Relative negative charge (QMNEG/QTMINUS) (MOPAC PC)   |
| 249000000 | RPCS Relative positive charged SA (SAMPOS*RPCG) (MOPAC PC) |
| 250000000 | RNCS Relative negative charged SA (SAMNEG*RNCG) (MOPAC PC) |
| 251000000 | THSA Mopac                                                 |
| 252000000 | TPSA Mopac                                                 |
| 253000000 | RHSA Mopac                                                 |
| 254000000 | RPSA Mopac                                                 |
| 255000000 | Max H partial charge MOPAC                                 |
| 256000000 | Max C partial charge MOPAC                                 |
| 257000000 | Min H partial charge MOPAC                                 |
| 258000000 | Min C partial charge MOPAC                                 |
| 259000000 | Max ALL partial charge MOPAC                               |
| 260000000 | Min ALL partial charge MOPAC                               |
| 261000000 | Polarity Parameter (MOPAC)                                 |
| 262000000 | HDSA H-donors surface area (MOPAC PC)                      |
| 263000000 | FHDSA Fractional HDSA (HDSA/TMSA) (MOPAC PC)               |
| 264000000 | HASA H-acceptors surface area (MOPAC PC)                   |

|           |                                              |
|-----------|----------------------------------------------|
| 265000000 | FHASA Fractional HASA (HASA/TMSA) (MOPAC PC) |
| 266000000 | HA dependent HDSA-2 (MOPAC PC)               |
| 267000000 | HA dependent HDSA-2/TMSA (MOPAC PC)          |
| 268000000 | HA dependent HDSA-2/SQRT(TMSA) (MOPAC PC)    |
| 269000000 | HA dependent HDCA-1 (MOPAC PC)               |
| 270000000 | HA dependent HDCA-1/TMSA (MOPAC PC)          |
| 271000000 | HA dependent HDCA-2 (MOPAC PC)               |
| 272000000 | HA dependent HDCA-2/TMSA (MOPAC PC)          |
| 273000000 | HA dependent HDCA-2/SQRT(TMSA) (MOPAC PC)    |
| 274000000 | HASA-2 (MOPAC PC)                            |
| 275000000 | HASA-2/TMSA (MOPAC PC)                       |
| 276000000 | HASA-2/SQRT(TMSA) (MOPAC PC)                 |
| 277000000 | HACA-1 (MOPAC PC)                            |
| 278000000 | HACA-1/TMSA (MOPAC PC)                       |
| 279000000 | HACA-2 (MOPAC PC)                            |
| 280000000 | HACA-2/TMSA (MOPAC PC)                       |
| 281000000 | HACA-2/SQRT(TMSA) (MOPAC PC)                 |
| 282000000 | Min atomic orbital electronic population     |
| 283000000 | Max atomic orbital electronic population     |
| 284000000 | Max SIGMA-SIGMA bond order                   |
| 285000000 | Max SIGMA-PI bond order                      |
| 286000000 | Max PI-PI bond order                         |
| 287000000 | Max bonding contribution of one MO           |
| 288000000 | Max antibonding contribution of one MO       |
| 289000000 | Avg valency for atom Cl                      |
| 290000000 | Avg bond order for atom Cl                   |
| 291000000 | Min valency for atom N                       |
| 292000000 | Max valency for atom N                       |
| 293000000 | Avg valency for atom N                       |

|           |                                    |
|-----------|------------------------------------|
| 294000000 | Min (>0.1) bond order for atom N   |
| 295000000 | Max bond order for atom N          |
| 296000000 | Avg bond order for atom N          |
| 297000000 | Min valency for atom C             |
| 298000000 | Max valency for atom C             |
| 299000000 | Avg valency for atom C             |
| 300000000 | Min (>0.1) bond order for atom C   |
| 301000000 | Max bond order for atom C          |
| 302000000 | Avg bond order for atom C          |
| 303000000 | Min valency for atom O             |
| 304000000 | Max valency for atom O             |
| 305000000 | Avg valency for atom O             |
| 306000000 | Min (>0.1) bond order for atom O   |
| 307000000 | Max bond order for atom O          |
| 308000000 | Avg bond order for atom O          |
| 309000000 | Min valency for atom H             |
| 310000000 | Max valency for atom H             |
| 311000000 | Avg valency for atom H             |
| 312000000 | Min (>0.1) bond order for atom H   |
| 313000000 | Max bond order for atom H          |
| 314000000 | Avg bond order for atom H          |
| 315000000 | Min e-e repulsion for atom N       |
| 316000000 | Max e-e repulsion for atom N       |
| 317000000 | Min e-n attraction for atom N      |
| 318000000 | Max e-n attraction for atom N      |
| 319000000 | Min atomic state energy for atom N |
| 320000000 | Max atomic state energy for atom N |
| 321000000 | Min e-e repulsion for atom C       |
| 322000000 | Max e-e repulsion for atom C       |

|           |                                          |
|-----------|------------------------------------------|
| 323000000 | Min e-n attraction for atom C            |
| 324000000 | Max e-n attraction for atom C            |
| 325000000 | Min atomic state energy for atom C       |
| 326000000 | Max atomic state energy for atom C       |
| 327000000 | Min e-e repulsion for atom O             |
| 328000000 | Max e-e repulsion for atom O             |
| 329000000 | Min e-n attraction for atom O            |
| 330000000 | Max e-n attraction for atom O            |
| 331000000 | Min atomic state energy for atom O       |
| 332000000 | Max atomic state energy for atom O       |
| 333000000 | Min e-e repulsion for atom H             |
| 334000000 | Max e-e repulsion for atom H             |
| 335000000 | Min e-n attraction for atom H            |
| 336000000 | Max e-n attraction for atom H            |
| 337000000 | Min atomic state energy for atom H       |
| 338000000 | Max atomic state energy for atom H       |
| 339000000 | Min resonance energy for bond C - N      |
| 340000000 | Max resonance energy for bond C - N      |
| 341000000 | Min exchange energy for bond C - N       |
| 342000000 | Max exchange energy for bond C - N       |
| 343000000 | Min e-e repulsion for bond C - N         |
| 344000000 | Max e-e repulsion for bond C - N         |
| 345000000 | Min e-n attraction for bond C - N        |
| 346000000 | Max e-n attraction for bond C - N        |
| 347000000 | Min n-n repulsion for bond C - N         |
| 348000000 | Max n-n repulsion for bond C - N         |
| 349000000 | Min coulombic interaction for bond C - N |
| 350000000 | Max coulombic interaction for bond C - N |
| 351000000 | Min total interaction for bond C - N     |

|           |                                                                 |
|-----------|-----------------------------------------------------------------|
| 352000000 | Max total interaction for bond C - N                            |
| 353000000 | Min resonance energy for interaction C - N in 2 bonds path      |
| 354000000 | Max resonance energy for interaction C - N in 2 bonds path      |
| 355000000 | Min exchange energy for interaction C - N in 2 bonds path       |
| 356000000 | Max exchange energy for interaction C - N in 2 bonds path       |
| 357000000 | Min e-e repulsion for interaction C - N in 2 bonds path         |
| 358000000 | Max e-e repulsion for interaction C - N in 2 bonds path         |
| 359000000 | Min e-n attraction for interaction C - N in 2 bonds path        |
| 360000000 | Max e-n attraction for interaction C - N in 2 bonds path        |
| 361000000 | Min n-n repulsion for interaction C - N in 2 bonds path         |
| 362000000 | Max n-n repulsion for interaction C - N in 2 bonds path         |
| 363000000 | Min coulumbic interaction for interaction C - N in 2 bonds path |
| 364000000 | Max coulumbic interaction for interaction C - N in 2 bonds path |
| 365000000 | Min total interaction for interaction C - N in 2 bonds path     |
| 366000000 | Max total interaction for interaction C - N in 2 bonds path     |
| 367000000 | Min resonance energy for interaction C - N in 3 bonds path      |
| 368000000 | Max resonance energy for interaction C - N in 3 bonds path      |
| 369000000 | Min exchange energy for interaction C - N in 3 bonds path       |
| 370000000 | Max exchange energy for interaction C - N in 3 bonds path       |
| 371000000 | Min e-e repulsion for interaction C - N in 3 bonds path         |
| 372000000 | Max e-e repulsion for interaction C - N in 3 bonds path         |
| 373000000 | Min e-n attraction for interaction C - N in 3 bonds path        |
| 374000000 | Max e-n attraction for interaction C - N in 3 bonds path        |
| 375000000 | Min n-n repulsion for interaction C - N in 3 bonds path         |
| 376000000 | Max n-n repulsion for interaction C - N in 3 bonds path         |
| 377000000 | Min coulumbic interaction for interaction C - N in 3 bonds path |
| 378000000 | Max coulumbic interaction for interaction C - N in 3 bonds path |
| 379000000 | Min total interaction for interaction C - N in 3 bonds path     |
| 380000000 | Max total interaction for interaction C - N in 3 bonds path     |

|           |                                                                   |
|-----------|-------------------------------------------------------------------|
| 381000000 | Min resonance energy for interaction C - N in > 3 bonds path      |
| 382000000 | Max resonance energy for interaction C - N in > 3 bonds path      |
| 383000000 | Min exchange energy for interaction C - N in > 3 bonds path       |
| 384000000 | Max exchange energy for interaction C - N in > 3 bonds path       |
| 385000000 | Min e-e repulsion for interaction C - N in > 3 bonds path         |
| 386000000 | Max e-e repulsion for interaction C - N in > 3 bonds path         |
| 387000000 | Min e-n attraction for interaction C - N in > 3 bonds path        |
| 388000000 | Max e-n attraction for interaction C - N in > 3 bonds path        |
| 389000000 | Min n-n repulsion for interaction C - N in > 3 bonds path         |
| 390000000 | Max n-n repulsion for interaction C - N in > 3 bonds path         |
| 391000000 | Min coulombic interaction for interaction C - N in > 3 bonds path |
| 392000000 | Max coulombic interaction for interaction C - N in > 3 bonds path |
| 393000000 | Min total interaction for interaction C - N in > 3 bonds path     |
| 394000000 | Max total interaction for interaction C - N in > 3 bonds path     |
| 395000000 | Min resonance energy for bond C - C                               |
| 396000000 | Max resonance energy for bond C - C                               |
| 397000000 | Min exchange energy for bond C - C                                |
| 398000000 | Max exchange energy for bond C - C                                |
| 399000000 | Min e-e repulsion for bond C - C                                  |
| 400000000 | Max e-e repulsion for bond C - C                                  |
| 401000000 | Min e-n attraction for bond C - C                                 |
| 402000000 | Max e-n attraction for bond C - C                                 |
| 403000000 | Min n-n repulsion for bond C - C                                  |
| 404000000 | Max n-n repulsion for bond C - C                                  |
| 405000000 | Min coulombic interaction for bond C - C                          |
| 406000000 | Max coulombic interaction for bond C - C                          |
| 407000000 | Min total interaction for bond C - C                              |
| 408000000 | Max total interaction for bond C - C                              |
| 409000000 | Min resonance energy for interaction C - C in 2 bonds path        |

|           |                                                                 |
|-----------|-----------------------------------------------------------------|
| 410000000 | Max resonance energy for interaction C - C in 2 bonds path      |
| 411000000 | Min exchange energy for interaction C - C in 2 bonds path       |
| 412000000 | Max exchange energy for interaction C - C in 2 bonds path       |
| 413000000 | Min e-e repulsion for interaction C - C in 2 bonds path         |
| 414000000 | Max e-e repulsion for interaction C - C in 2 bonds path         |
| 415000000 | Min e-n attraction for interaction C - C in 2 bonds path        |
| 416000000 | Max e-n attraction for interaction C - C in 2 bonds path        |
| 417000000 | Min n-n repulsion for interaction C - C in 2 bonds path         |
| 418000000 | Max n-n repulsion for interaction C - C in 2 bonds path         |
| 419000000 | Min coulumbic interaction for interaction C - C in 2 bonds path |
| 420000000 | Max coulumbic interaction for interaction C - C in 2 bonds path |
| 421000000 | Min total interaction for interaction C - C in 2 bonds path     |
| 422000000 | Max total interaction for interaction C - C in 2 bonds path     |
| 423000000 | Min resonance energy for interaction C - C in 3 bonds path      |
| 424000000 | Max resonance energy for interaction C - C in 3 bonds path      |
| 425000000 | Min exchange energy for interaction C - C in 3 bonds path       |
| 426000000 | Max exchange energy for interaction C - C in 3 bonds path       |
| 427000000 | Min e-e repulsion for interaction C - C in 3 bonds path         |
| 428000000 | Max e-e repulsion for interaction C - C in 3 bonds path         |
| 429000000 | Min e-n attraction for interaction C - C in 3 bonds path        |
| 430000000 | Max e-n attraction for interaction C - C in 3 bonds path        |
| 431000000 | Min n-n repulsion for interaction C - C in 3 bonds path         |
| 432000000 | Max n-n repulsion for interaction C - C in 3 bonds path         |
| 433000000 | Min coulumbic interaction for interaction C - C in 3 bonds path |
| 434000000 | Max coulumbic interaction for interaction C - C in 3 bonds path |
| 435000000 | Min total interaction for interaction C - C in 3 bonds path     |
| 436000000 | Max total interaction for interaction C - C in 3 bonds path     |
| 437000000 | Min resonance energy for interaction C - C in > 3 bonds path    |
| 438000000 | Max resonance energy for interaction C - C in > 3 bonds path    |

|           |                                                                   |
|-----------|-------------------------------------------------------------------|
| 439000000 | Min exchange energy for interaction C - C in > 3 bonds path       |
| 440000000 | Max exchange energy for interaction C - C in > 3 bonds path       |
| 441000000 | Min e-e repulsion for interaction C - C in > 3 bonds path         |
| 442000000 | Max e-e repulsion for interaction C - C in > 3 bonds path         |
| 443000000 | Min e-n attraction for interaction C - C in > 3 bonds path        |
| 444000000 | Max e-n attraction for interaction C - C in > 3 bonds path        |
| 445000000 | Min n-n repulsion for interaction C - C in > 3 bonds path         |
| 446000000 | Max n-n repulsion for interaction C - C in > 3 bonds path         |
| 447000000 | Min coulombic interaction for interaction C - C in > 3 bonds path |
| 448000000 | Max coulombic interaction for interaction C - C in > 3 bonds path |
| 449000000 | Min total interaction for interaction C - C in > 3 bonds path     |
| 450000000 | Max total interaction for interaction C - C in > 3 bonds path     |
| 451000000 | Min resonance energy for bond C - O                               |
| 452000000 | Max resonance energy for bond C - O                               |
| 453000000 | Min exchange energy for bond C - O                                |
| 454000000 | Max exchange energy for bond C - O                                |
| 455000000 | Min e-e repulsion for bond C - O                                  |
| 456000000 | Max e-e repulsion for bond C - O                                  |
| 457000000 | Min e-n attraction for bond C - O                                 |
| 458000000 | Max e-n attraction for bond C - O                                 |
| 459000000 | Min n-n repulsion for bond C - O                                  |
| 460000000 | Max n-n repulsion for bond C - O                                  |
| 461000000 | Min coulombic interaction for bond C - O                          |
| 462000000 | Max coulombic interaction for bond C - O                          |
| 463000000 | Min total interaction for bond C - O                              |
| 464000000 | Max total interaction for bond C - O                              |
| 465000000 | Min resonance energy for interaction C - O in 2 bonds path        |
| 466000000 | Max resonance energy for interaction C - O in 2 bonds path        |
| 467000000 | Min exchange energy for interaction C - O in 2 bonds path         |



|           |                                                                 |
|-----------|-----------------------------------------------------------------|
| 468000000 | Max exchange energy for interaction C - O in 2 bonds path       |
| 469000000 | Min e-e repulsion for interaction C - O in 2 bonds path         |
| 470000000 | Max e-e repulsion for interaction C - O in 2 bonds path         |
| 471000000 | Min e-n attraction for interaction C - O in 2 bonds path        |
| 472000000 | Max e-n attraction for interaction C - O in 2 bonds path        |
| 473000000 | Min n-n repulsion for interaction C - O in 2 bonds path         |
| 474000000 | Max n-n repulsion for interaction C - O in 2 bonds path         |
| 475000000 | Min coulumbic interaction for interaction C - O in 2 bonds path |
| 476000000 | Max coulumbic interaction for interaction C - O in 2 bonds path |
| 477000000 | Min total interaction for interaction C - O in 2 bonds path     |
| 478000000 | Max total interaction for interaction C - O in 2 bonds path     |
| 479000000 | Min resonance energy for interaction C - O in 3 bonds path      |
| 480000000 | Max resonance energy for interaction C - O in 3 bonds path      |
| 481000000 | Min exchange energy for interaction C - O in 3 bonds path       |
| 482000000 | Max exchange energy for interaction C - O in 3 bonds path       |
| 483000000 | Min e-e repulsion for interaction C - O in 3 bonds path         |
| 484000000 | Max e-e repulsion for interaction C - O in 3 bonds path         |
| 485000000 | Min e-n attraction for interaction C - O in 3 bonds path        |
| 486000000 | Max e-n attraction for interaction C - O in 3 bonds path        |
| 487000000 | Min n-n repulsion for interaction C - O in 3 bonds path         |
| 488000000 | Max n-n repulsion for interaction C - O in 3 bonds path         |
| 489000000 | Min coulumbic interaction for interaction C - O in 3 bonds path |
| 490000000 | Max coulumbic interaction for interaction C - O in 3 bonds path |
| 491000000 | Min total interaction for interaction C - O in 3 bonds path     |
| 492000000 | Max total interaction for interaction C - O in 3 bonds path     |
| 493000000 | Min resonance energy for interaction C - O in > 3 bonds path    |
| 494000000 | Max resonance energy for interaction C - O in > 3 bonds path    |
| 495000000 | Min exchange energy for interaction C - O in > 3 bonds path     |
| 496000000 | Max exchange energy for interaction C - O in > 3 bonds path     |

|           |                                                                   |
|-----------|-------------------------------------------------------------------|
| 497000000 | Min e-e repulsion for interaction C - O in > 3 bonds path         |
| 498000000 | Max e-e repulsion for interaction C - O in > 3 bonds path         |
| 499000000 | Min e-n attraction for interaction C - O in > 3 bonds path        |
| 500000000 | Max e-n attraction for interaction C - O in > 3 bonds path        |
| 501000000 | Min n-n repulsion for interaction C - O in > 3 bonds path         |
| 502000000 | Max n-n repulsion for interaction C - O in > 3 bonds path         |
| 503000000 | Min coulombic interaction for interaction C - O in > 3 bonds path |
| 504000000 | Max coulombic interaction for interaction C - O in > 3 bonds path |
| 505000000 | Min total interaction for interaction C - O in > 3 bonds path     |
| 506000000 | Max total interaction for interaction C - O in > 3 bonds path     |
| 507000000 | Min resonance energy for bond H - C                               |
| 508000000 | Max resonance energy for bond H - C                               |
| 509000000 | Min exchange energy for bond H - C                                |
| 510000000 | Max exchange energy for bond H - C                                |
| 511000000 | Min e-e repulsion for bond H - C                                  |
| 512000000 | Max e-e repulsion for bond H - C                                  |
| 513000000 | Min e-n attraction for bond H - C                                 |
| 514000000 | Max e-n attraction for bond H - C                                 |
| 515000000 | Min n-n repulsion for bond H - C                                  |
| 516000000 | Max n-n repulsion for bond H - C                                  |
| 517000000 | Min coulombic interaction for bond H - C                          |
| 518000000 | Max coulombic interaction for bond H - C                          |
| 519000000 | Min total interaction for bond H - C                              |
| 520000000 | Max total interaction for bond H - C                              |
| 521000000 | Min resonance energy for interaction C - H in 2 bonds path        |
| 522000000 | Max resonance energy for interaction C - H in 2 bonds path        |
| 523000000 | Min exchange energy for interaction C - H in 2 bonds path         |
| 524000000 | Max exchange energy for interaction C - H in 2 bonds path         |
| 525000000 | Min e-e repulsion for interaction C - H in 2 bonds path           |

|           |                                                                 |
|-----------|-----------------------------------------------------------------|
| 526000000 | Max e-e repulsion for interaction C - H in 2 bonds path         |
| 527000000 | Min e-n attraction for interaction C - H in 2 bonds path        |
| 528000000 | Max e-n attraction for interaction C - H in 2 bonds path        |
| 529000000 | Min n-n repulsion for interaction C - H in 2 bonds path         |
| 530000000 | Max n-n repulsion for interaction C - H in 2 bonds path         |
| 531000000 | Min coulumbic interaction for interaction C - H in 2 bonds path |
| 532000000 | Max coulumbic interaction for interaction C - H in 2 bonds path |
| 533000000 | Min total interaction for interaction C - H in 2 bonds path     |
| 534000000 | Max total interaction for interaction C - H in 2 bonds path     |
| 535000000 | Min resonance energy for interaction C - H in 3 bonds path      |
| 536000000 | Max resonance energy for interaction C - H in 3 bonds path      |
| 537000000 | Min exchange energy for interaction C - H in 3 bonds path       |
| 538000000 | Max exchange energy for interaction C - H in 3 bonds path       |
| 539000000 | Min e-e repulsion for interaction C - H in 3 bonds path         |
| 540000000 | Max e-e repulsion for interaction C - H in 3 bonds path         |
| 541000000 | Min e-n attraction for interaction C - H in 3 bonds path        |
| 542000000 | Max e-n attraction for interaction C - H in 3 bonds path        |
| 543000000 | Min n-n repulsion for interaction C - H in 3 bonds path         |
| 544000000 | Max n-n repulsion for interaction C - H in 3 bonds path         |
| 545000000 | Min coulumbic interaction for interaction C - H in 3 bonds path |
| 546000000 | Max coulumbic interaction for interaction C - H in 3 bonds path |
| 547000000 | Min total interaction for interaction C - H in 3 bonds path     |
| 548000000 | Max total interaction for interaction C - H in 3 bonds path     |
| 549000000 | Min resonance energy for interaction C - H in > 3 bonds path    |
| 550000000 | Max resonance energy for interaction C - H in > 3 bonds path    |
| 551000000 | Min exchange energy for interaction C - H in > 3 bonds path     |
| 552000000 | Max exchange energy for interaction C - H in > 3 bonds path     |
| 553000000 | Min e-e repulsion for interaction C - H in > 3 bonds path       |
| 554000000 | Max e-e repulsion for interaction C - H in > 3 bonds path       |

|           |                                                                   |
|-----------|-------------------------------------------------------------------|
| 555000000 | Min e-n attraction for interaction C - H in > 3 bonds path        |
| 556000000 | Max e-n attraction for interaction C - H in > 3 bonds path        |
| 557000000 | Min n-n repulsion for interaction C - H in > 3 bonds path         |
| 558000000 | Max n-n repulsion for interaction C - H in > 3 bonds path         |
| 559000000 | Min coulumbic interaction for interaction C - H in > 3 bonds path |
| 560000000 | Max coulumbic interaction for interaction C - H in > 3 bonds path |
| 561000000 | Min total interaction for interaction C - H in > 3 bonds path     |
| 562000000 | Max total interaction for interaction C - H in > 3 bonds path     |
| 563000000 | Min resonance energy for interaction N - H in 2 bonds path        |
| 564000000 | Max resonance energy for interaction N - H in 2 bonds path        |
| 565000000 | Min exchange energy for interaction N - H in 2 bonds path         |
| 566000000 | Max exchange energy for interaction N - H in 2 bonds path         |
| 567000000 | Min e-e repulsion for interaction N - H in 2 bonds path           |
| 568000000 | Max e-e repulsion for interaction N - H in 2 bonds path           |
| 569000000 | Min e-n attraction for interaction N - H in 2 bonds path          |
| 570000000 | Max e-n attraction for interaction N - H in 2 bonds path          |
| 571000000 | Min n-n repulsion for interaction N - H in 2 bonds path           |
| 572000000 | Max n-n repulsion for interaction N - H in 2 bonds path           |
| 573000000 | Min coulumbic interaction for interaction N - H in 2 bonds path   |
| 574000000 | Max coulumbic interaction for interaction N - H in 2 bonds path   |
| 575000000 | Min total interaction for interaction N - H in 2 bonds path       |
| 576000000 | Max total interaction for interaction N - H in 2 bonds path       |
| 577000000 | Min resonance energy for interaction N - H in 3 bonds path        |
| 578000000 | Max resonance energy for interaction N - H in 3 bonds path        |
| 579000000 | Min exchange energy for interaction N - H in 3 bonds path         |
| 580000000 | Max exchange energy for interaction N - H in 3 bonds path         |
| 581000000 | Min e-e repulsion for interaction N - H in 3 bonds path           |
| 582000000 | Max e-e repulsion for interaction N - H in 3 bonds path           |
| 583000000 | Min e-n attraction for interaction N - H in 3 bonds path          |

|           |                                                                   |
|-----------|-------------------------------------------------------------------|
| 584000000 | Max e-n attraction for interaction N - H in 3 bonds path          |
| 585000000 | Min n-n repulsion for interaction N - H in 3 bonds path           |
| 586000000 | Max n-n repulsion for interaction N - H in 3 bonds path           |
| 587000000 | Min coulumbic interaction for interaction N - H in 3 bonds path   |
| 588000000 | Max coulumbic interaction for interaction N - H in 3 bonds path   |
| 589000000 | Min total interaction for interaction N - H in 3 bonds path       |
| 590000000 | Max total interaction for interaction N - H in 3 bonds path       |
| 591000000 | Min resonance energy for interaction N - H in > 3 bonds path      |
| 592000000 | Max resonance energy for interaction N - H in > 3 bonds path      |
| 593000000 | Min exchange energy for interaction N - H in > 3 bonds path       |
| 594000000 | Max exchange energy for interaction N - H in > 3 bonds path       |
| 595000000 | Min e-e repulsion for interaction N - H in > 3 bonds path         |
| 596000000 | Max e-e repulsion for interaction N - H in > 3 bonds path         |
| 597000000 | Min e-n attraction for interaction N - H in > 3 bonds path        |
| 598000000 | Max e-n attraction for interaction N - H in > 3 bonds path        |
| 599000000 | Min n-n repulsion for interaction N - H in > 3 bonds path         |
| 600000000 | Max n-n repulsion for interaction N - H in > 3 bonds path         |
| 601000000 | Min coulumbic interaction for interaction N - H in > 3 bonds path |
| 602000000 | Max coulumbic interaction for interaction N - H in > 3 bonds path |
| 603000000 | Min total interaction for interaction N - H in > 3 bonds path     |
| 604000000 | Max total interaction for interaction N - H in > 3 bonds path     |
| 605000000 | eccentricConnectivityIndex                                        |
| 606000000 | FMFDescriptor                                                     |
| 607000000 | FractionalPSA                                                     |
| 608000000 | FragmentComplexity                                                |
| 609000000 | count of H-acceptor sites (Zefirov PC)                            |
| 610000000 | count of H-donors sites (Zefirov PC)                              |
| 611000000 | HybridationRatio                                                  |
| 612000000 | [LiD1]-*                                                          |

|           |                                 |
|-----------|---------------------------------|
| 613000000 | [BeD2](-*)-*                    |
| 614000000 | [BeD4](-*)(-*)(-*)-*            |
| 615000000 | [BD2H](-*)-*                    |
| 616000000 | [BD3](-*)(-*)-*                 |
| 617000000 | [BD4](-*)(-*)(-*)-*             |
| 618000000 | [CD1H3]-*                       |
| 620000000 | [CD2H2](-*)-*                   |
| 621000000 | [CD1H]#*                        |
| 624000000 | [CD3H](-*)(-*)-*                |
| 626000000 | [CD2H0] (#*)-*                  |
| 628000000 | [CD4H0](-*)(-*)(-*)-*           |
| 629000000 | [ND1H3]-*                       |
| 630000000 | [ND1H2]-*                       |
| 631000000 | [ND2H2](-*)-*                   |
| 633000000 | [ND2H](-*)-*                    |
| 634000000 | [N,nD2H](:*):*                  |
| 635000000 | [ND1H0]#*                       |
| 636000000 | [ND3H](-*)(-*)-*                |
| 638000000 | [N,nD2H0](:*):*                 |
| 639000000 | [ND3H0](-*)(-*)-*               |
| 640000000 | [ND3H0](~[OD1H0])(~[OD1H0])-,:* |
| 641000000 | [N,nD3H0](:*)(:*)-,:*           |
| 642000000 | [ND4H0](-*)(-*)(-*)-*           |
| 643000000 | [OD1H]-*                        |
| 645000000 | [OD2H0](-*)-*                   |
| 646000000 | [O,oD2H0](:*):*                 |
| 647000000 | [FD1]-*                         |
| 648000000 | [SiD1H3]-*                      |
| 649000000 | [SiD2H2](-*)-*                  |

|           |                                   |
|-----------|-----------------------------------|
| 650000000 | [SiD3H1](-*)(-*)-*                |
| 651000000 | [SiD4H0](-*)(-*)(-*)-*            |
| 652000000 | [PD1H2]-*                         |
| 653000000 | [PD2H1](-*)-*                     |
| 654000000 | [PD3H0](-*)(-*)-*                 |
| 656000000 | [PD5H0](-*)(-*)(-*)(-*)-*         |
| 657000000 | [SD1H1]-*                         |
| 659000000 | [SD2H0](-*)-*                     |
| 660000000 | [S,sD2H0](.*).*                   |
| 662000000 | [SD4H0](~[OD1H0])(~[OD1H0])(-*)-* |
| 663000000 | [CID1]-*                          |
| 664000000 | [GeD1H3](-*)                      |
| 665000000 | [GeD2H2](-*)-*                    |
| 666000000 | [GeD3H1](-*)(-*)-*                |
| 667000000 | [GeD4H0](-*)(-*)(-*)-*            |
| 668000000 | [AsD1H2]-*                        |
| 669000000 | [AsD2H1](-*)-*                    |
| 670000000 | [AsD3H0](-*)(-*)-*                |
| 672000000 | [AsD5H0](-*)(-*)(-*)(-*)-*        |
| 673000000 | [SeD1H1]-*                        |
| 675000000 | [SeD2H0](-*)-*                    |
| 676000000 | [SeD2H0](.*).*                    |
| 679000000 | [BrD1]-*                          |
| 680000000 | [SnD1H3]-*                        |
| 681000000 | [SnD2H2](-*)-*                    |
| 682000000 | [SnD3H1](-*)(-*)-*                |
| 683000000 | [SnD4H0](-*)(-*)(-*)-*            |
| 684000000 | [ID1]-*                           |
| 685000000 | [PbD1H3]-*                        |

|           |                                                                      |
|-----------|----------------------------------------------------------------------|
| 686000000 | [PbD2H2](-*)-*                                                       |
| 687000000 | [PbD3H1](-*)(-*)-*                                                   |
| 688000000 | [PbD4H0](-*)(-*)(-*)-*                                               |
| 689000000 | LargestChain                                                         |
| 690000000 | LargestPISystem                                                      |
| 690000000 | LargestPISystem                                                      |
| 691000000 | maximum L/B ratio                                                    |
| 692000000 | LOBMIN                                                               |
| 693000000 | longestAliphaticChain                                                |
| 694000000 | mannholdLogP                                                         |
| 695000000 | molecular distance edge between all primary carbons                  |
| 696000000 | molecular distance edge between all primary and secondary carbons    |
| 697000000 | molecular distance edge between all primary and tertiary carbons     |
| 698000000 | molecular distance edge between all primary and quaternary carbons   |
| 699000000 | molecular distance edge between all secondary carbons                |
| 700000000 | molecular distance edge between all secondary and tertiary carbons   |
| 701000000 | molecular distance edge between all secondary and quaternary carbons |
| 702000000 | molecular distance edge between all tertiary carbons                 |
| 703000000 | molecular distance edge between all tertiary and quaternary carbons  |
| 704000000 | molecular distance edge between all quaternary carbons               |
| 705000000 | molecular distance edge between all primary oxygens                  |
| 706000000 | molecular distance edge between all primary and secondary oxygens    |
| 707000000 | molecular distance edge between all secondary oxygens                |
| 708000000 | molecular distance edge between all primary nitrogens                |
| 709000000 | molecular distance edge between all primary and secondary nitrogens  |
| 710000000 | molecular distance edge between all primary and tertiary nitrogens   |
| 711000000 | molecular distance edge between all secondary nitrogens              |
| 712000000 | molecular distance edge between all secondary and tertiary nitrogens |
| 713000000 | molecular distance edge between all tertiary nitrogens               |



|           |                                                     |
|-----------|-----------------------------------------------------|
| 714000000 | PetitJeanNumber                                     |
| 715000000 | PetitJeanShapeTopological                           |
| 716000000 | PetitJeanShape D2H](.*):*                           |
| 717000000 | RotatableBondCount-withTerminalwithoutCN            |
| 718000000 | RotatableBondCount-withTerminalwithCN               |
| 719000000 | RotatableBondCount-withoutTerminalwithoutCN         |
| 720000000 | RotatableBondCount-withoutTerminalwithCN            |
| 721000000 | LipinskyRuleOff D3H0](.*)(:*)-*                     |
| 722000000 | NSmallRings D3H0](.*)(:*):*                         |
| 723000000 | NAromaticRings                                      |
| 724000000 | NRingsBlocks                                        |
| 725000000 | NARomaticBlocks                                     |
| 726000000 | NRingswith3atoms                                    |
| 727000000 | NRingswith4atoms                                    |
| 728000000 | NRingswith5atoms                                    |
| 729000000 | NRingswith6atoms                                    |
| 730000000 | NRingswith7atoms                                    |
| 731000000 | NRingswith8atoms                                    |
| 732000000 | NRingswith9atoms                                    |
| 733000000 | Vertex adjacency information                        |
| 824000000 | XLogP                                               |
| 825000000 | ZagrebIndex                                         |
| 826000000 | Broto-Moreau autocorrelation lag 0 weighted by mass |
| 827000000 | Broto-Moreau autocorrelation lag 1 weighted by mass |
| 828000000 | Broto-Moreau autocorrelation lag 2 weighted by mass |
| 829000000 | Broto-Moreau autocorrelation lag 3 weighted by mass |
| 830000000 | Broto-Moreau autocorrelation lag 4 weighted by mass |
| 831000000 | Broto-Moreau autocorrelation lag 5 weighted by mass |
| 832000000 | Broto-Moreau autocorrelation lag 6 weighted by mass |

|           |                                                                              |
|-----------|------------------------------------------------------------------------------|
| 833000000 | Broto-Moreau autocorrelation lag 7 weighted by mass                          |
| 834000000 | Broto-Moreau autocorrelation lag 8 weighted by mass                          |
| 835000000 | Broto-Moreau autocorrelation lag 0 weighted by van der Waals volumes         |
| 836000000 | Broto-Moreau autocorrelation lag 1 weighted by van der Waals volumes         |
| 837000000 | Broto-Moreau autocorrelation lag 2 weighted by van der Waals volumes         |
| 838000000 | Broto-Moreau autocorrelation lag 3 weighted by van der Waals volumes         |
| 839000000 | Broto-Moreau autocorrelation lag 4 weighted by van der Waals volumes         |
| 840000000 | Broto-Moreau autocorrelation lag 5 weighted by van der Waals volumes         |
| 841000000 | Broto-Moreau autocorrelation lag 6 weighted by van der Waals volumes         |
| 842000000 | Broto-Moreau autocorrelation lag 7 weighted by van der Waals volumes         |
| 843000000 | Broto-Moreau autocorrelation lag 8 weighted by van der Waals volumes         |
| 844000000 | Broto-Moreau autocorrelation lag 0 weighted by Sanderson electronegativities |
| 845000000 | Broto-Moreau autocorrelation lag 1 weighted by Sanderson electronegativities |
| 846000000 | Broto-Moreau autocorrelation lag 2 weighted by Sanderson electronegativities |
| 847000000 | Broto-Moreau autocorrelation lag 3 weighted by Sanderson electronegativities |
| 848000000 | Broto-Moreau autocorrelation lag 4 weighted by Sanderson electronegativities |
| 849000000 | Broto-Moreau autocorrelation lag 5 weighted by Sanderson electronegativities |
| 850000000 | Broto-Moreau autocorrelation lag 6 weighted by Sanderson electronegativities |
| 851000000 | Broto-Moreau autocorrelation lag 7 weighted by Sanderson electronegativities |
| 852000000 | Broto-Moreau autocorrelation lag 8 weighted by Sanderson electronegativities |
| 853000000 | Broto-Moreau autocorrelation lag 0 weighted by polarizabilities              |
| 854000000 | Broto-Moreau autocorrelation lag 1 weighted by polarizabilities              |
| 855000000 | Broto-Moreau autocorrelation lag 2 weighted by polarizabilities              |
| 856000000 | Broto-Moreau autocorrelation lag 3 weighted by polarizabilities              |
| 857000000 | Broto-Moreau autocorrelation lag 4 weighted by polarizabilities              |
| 858000000 | Broto-Moreau autocorrelation lag 5 weighted by polarizabilities              |
| 859000000 | Broto-Moreau autocorrelation lag 6 weighted by polarizabilities              |
| 860000000 | Broto-Moreau autocorrelation lag 7 weighted by polarizabilities              |
| 861000000 | Broto-Moreau autocorrelation lag 8 weighted by polarizabilities              |

|           |                                                                              |
|-----------|------------------------------------------------------------------------------|
| 862000000 | Broto-Moreau autocorrelation lag 0 weighted by first ionization potential    |
| 863000000 | Broto-Moreau autocorrelation lag 1 weighted by first ionization potential    |
| 864000000 | Broto-Moreau autocorrelation lag 2 weighted by first ionization potential    |
| 865000000 | Broto-Moreau autocorrelation lag 3 weighted by first ionization potential    |
| 866000000 | Broto-Moreau autocorrelation lag 4 weighted by first ionization potential    |
| 867000000 | Broto-Moreau autocorrelation lag 5 weighted by first ionization potential    |
| 868000000 | Broto-Moreau autocorrelation lag 6 weighted by first ionization potential    |
| 869000000 | Broto-Moreau autocorrelation lag 7 weighted by first ionization potential    |
| 870000000 | Broto-Moreau autocorrelation lag 8 weighted by first ionization potential    |
| 871000000 | Broto-Moreau autocorrelation lag 0 weighted by I-state                       |
| 872000000 | Broto-Moreau autocorrelation lag 1 weighted by I-state                       |
| 873000000 | Broto-Moreau autocorrelation lag 2 weighted by I-state                       |
| 874000000 | Broto-Moreau autocorrelation lag 3 weighted by I-state                       |
| 875000000 | Broto-Moreau autocorrelation lag 4 weighted by I-state                       |
| 876000000 | Broto-Moreau autocorrelation lag 5 weighted by I-state                       |
| 877000000 | Broto-Moreau autocorrelation lag 6 weighted by I-state                       |
| 878000000 | Broto-Moreau autocorrelation lag 7 weighted by I-state                       |
| 879000000 | Broto-Moreau autocorrelation lag 8 weighted by I-state                       |
| 880000000 | Average Broto-Moreau autocorrelation lag 0 weighted by mass                  |
| 881000000 | Average Broto-Moreau autocorrelation lag 1 weighted by mass                  |
| 882000000 | Average Broto-Moreau autocorrelation lag 2 weighted by mass                  |
| 883000000 | Average Broto-Moreau autocorrelation lag 3 weighted by mass                  |
| 884000000 | Average Broto-Moreau autocorrelation lag 4 weighted by mass                  |
| 885000000 | Average Broto-Moreau autocorrelation lag 5 weighted by mass                  |
| 886000000 | Average Broto-Moreau autocorrelation lag 6 weighted by mass                  |
| 887000000 | Average Broto-Moreau autocorrelation lag 7 weighted by mass                  |
| 888000000 | Average Broto-Moreau autocorrelation lag 8 weighted by mass                  |
| 889000000 | Average Broto-Moreau autocorrelation lag 0 weighted by van der Waals volumes |
| 890000000 | Average Broto-Moreau autocorrelation lag 1 weighted by van der Waals volumes |

|           |                                                                                      |
|-----------|--------------------------------------------------------------------------------------|
| 891000000 | Average Broto-Moreau autocorrelation lag 2 weighted by van der Waals volumes         |
| 892000000 | Average Broto-Moreau autocorrelation lag 3 weighted by van der Waals volumes         |
| 893000000 | Average Broto-Moreau autocorrelation lag 4 weighted by van der Waals volumes         |
| 894000000 | Average Broto-Moreau autocorrelation lag 5 weighted by van der Waals volumes         |
| 895000000 | Average Broto-Moreau autocorrelation lag 6 weighted by van der Waals volumes         |
| 896000000 | Average Broto-Moreau autocorrelation lag 7 weighted by van der Waals volumes         |
| 897000000 | Average Broto-Moreau autocorrelation lag 8 weighted by van der Waals volumes         |
| 898000000 | Average Broto-Moreau autocorrelation lag 0 weighted by Sanderson electronegativities |
| 899000000 | Average Broto-Moreau autocorrelation lag 1 weighted by Sanderson electronegativities |
| 900000000 | Average Broto-Moreau autocorrelation lag 2 weighted by Sanderson electronegativities |
| 901000000 | Average Broto-Moreau autocorrelation lag 3 weighted by Sanderson electronegativities |
| 902000000 | Average Broto-Moreau autocorrelation lag 4 weighted by Sanderson electronegativities |
| 903000000 | Average Broto-Moreau autocorrelation lag 5 weighted by Sanderson electronegativities |
| 904000000 | Average Broto-Moreau autocorrelation lag 6 weighted by Sanderson electronegativities |
| 905000000 | Average Broto-Moreau autocorrelation lag 7 weighted by Sanderson electronegativities |
| 906000000 | Average Broto-Moreau autocorrelation lag 8 weighted by Sanderson electronegativities |
| 907000000 | Average Broto-Moreau autocorrelation lag 0 weighted by polarizabilities              |
| 908000000 | Average Broto-Moreau autocorrelation lag 1 weighted by polarizabilities              |
| 909000000 | Average Broto-Moreau autocorrelation lag 2 weighted by polarizabilities              |
| 910000000 | Average Broto-Moreau autocorrelation lag 3 weighted by polarizabilities              |
| 911000000 | Average Broto-Moreau autocorrelation lag 4 weighted by polarizabilities              |
| 912000000 | Average Broto-Moreau autocorrelation lag 5 weighted by polarizabilities              |
| 913000000 | Average Broto-Moreau autocorrelation lag 6 weighted by polarizabilities              |
| 914000000 | Average Broto-Moreau autocorrelation lag 7 weighted by polarizabilities              |
| 915000000 | Average Broto-Moreau autocorrelation lag 8 weighted by polarizabilities              |
| 916000000 | Average Broto-Moreau autocorrelation lag 0 weighted by first ionization potential    |
| 917000000 | Average Broto-Moreau autocorrelation lag 1 weighted by first ionization potential    |
| 918000000 | Average Broto-Moreau autocorrelation lag 2 weighted by first ionization potential    |
| 919000000 | Average Broto-Moreau autocorrelation lag 3 weighted by first ionization potential    |

|           |                                                                                   |
|-----------|-----------------------------------------------------------------------------------|
| 920000000 | Average Broto-Moreau autocorrelation lag 4 weighted by first ionization potential |
| 921000000 | Average Broto-Moreau autocorrelation lag 5 weighted by first ionization potential |
| 922000000 | Average Broto-Moreau autocorrelation lag 6 weighted by first ionization potential |
| 923000000 | Average Broto-Moreau autocorrelation lag 7 weighted by first ionization potential |
| 924000000 | Average Broto-Moreau autocorrelation lag 8 weighted by first ionization potential |
| 925000000 | Average Broto-Moreau autocorrelation lag 0 weighted by I-state                    |
| 926000000 | Average Broto-Moreau autocorrelation lag 1 weighted by I-state                    |
| 927000000 | Average Broto-Moreau autocorrelation lag 2 weighted by I-state                    |
| 928000000 | Average Broto-Moreau autocorrelation lag 3 weighted by I-state                    |
| 929000000 | Average Broto-Moreau autocorrelation lag 4 weighted by I-state                    |
| 930000000 | Average Broto-Moreau autocorrelation lag 5 weighted by I-state                    |
| 931000000 | Average Broto-Moreau autocorrelation lag 6 weighted by I-state                    |
| 932000000 | Average Broto-Moreau autocorrelation lag 7 weighted by I-state                    |
| 933000000 | Average Broto-Moreau autocorrelation lag 8 weighted by I-state                    |
| 934000000 | Centered Broto-Moreau autocorrelation lag 0 weighted by charges                   |
| 935000000 | Centered Broto-Moreau autocorrelation lag 1 weighted by charges                   |
| 936000000 | Centered Broto-Moreau autocorrelation lag 2 weighted by charges                   |
| 937000000 | Centered Broto-Moreau autocorrelation lag 3 weighted by charges                   |
| 938000000 | Centered Broto-Moreau autocorrelation lag 4 weighted by charges                   |
| 939000000 | Centered Broto-Moreau autocorrelation lag 5 weighted by charges                   |
| 940000000 | Centered Broto-Moreau autocorrelation lag 6 weighted by charges                   |
| 941000000 | Centered Broto-Moreau autocorrelation lag 7 weighted by charges                   |
| 942000000 | Centered Broto-Moreau autocorrelation lag 8 weighted by charges                   |
| 943000000 | Centered Broto-Moreau autocorrelation lag 0 weighted by mass                      |
| 944000000 | Centered Broto-Moreau autocorrelation lag 1 weighted by mass                      |
| 945000000 | Centered Broto-Moreau autocorrelation lag 2 weighted by mass                      |
| 946000000 | Centered Broto-Moreau autocorrelation lag 3 weighted by mass                      |
| 947000000 | Centered Broto-Moreau autocorrelation lag 4 weighted by mass                      |
| 948000000 | Centered Broto-Moreau autocorrelation lag 5 weighted by mass                      |

|           |                                                                                       |
|-----------|---------------------------------------------------------------------------------------|
| 949000000 | Centered Broto-Moreau autocorrelation lag 6 weighted by mass                          |
| 950000000 | Centered Broto-Moreau autocorrelation lag 7 weighted by mass                          |
| 951000000 | Centered Broto-Moreau autocorrelation lag 8 weighted by mass                          |
| 952000000 | Centered Broto-Moreau autocorrelation lag 0 weighted by van der Waals volumes         |
| 953000000 | Centered Broto-Moreau autocorrelation lag 1 weighted by van der Waals volumes         |
| 954000000 | Centered Broto-Moreau autocorrelation lag 2 weighted by van der Waals volumes         |
| 955000000 | Centered Broto-Moreau autocorrelation lag 3 weighted by van der Waals volumes         |
| 956000000 | Centered Broto-Moreau autocorrelation lag 4 weighted by van der Waals volumes         |
| 957000000 | Centered Broto-Moreau autocorrelation lag 5 weighted by van der Waals volumes         |
| 958000000 | Centered Broto-Moreau autocorrelation lag 6 weighted by van der Waals volumes         |
| 959000000 | Centered Broto-Moreau autocorrelation lag 7 weighted by van der Waals volumes         |
| 960000000 | Centered Broto-Moreau autocorrelation lag 8 weighted by van der Waals volumes         |
| 961000000 | Centered Broto-Moreau autocorrelation lag 0 weighted by Sanderson electronegativities |
| 962000000 | Centered Broto-Moreau autocorrelation lag 1 weighted by Sanderson electronegativities |
| 963000000 | Centered Broto-Moreau autocorrelation lag 2 weighted by Sanderson electronegativities |
| 964000000 | Centered Broto-Moreau autocorrelation lag 3 weighted by Sanderson electronegativities |
| 965000000 | Centered Broto-Moreau autocorrelation lag 4 weighted by Sanderson electronegativities |
| 966000000 | Centered Broto-Moreau autocorrelation lag 5 weighted by Sanderson electronegativities |
| 967000000 | Centered Broto-Moreau autocorrelation lag 6 weighted by Sanderson electronegativities |
| 968000000 | Centered Broto-Moreau autocorrelation lag 7 weighted by Sanderson electronegativities |
| 969000000 | Centered Broto-Moreau autocorrelation lag 8 weighted by Sanderson electronegativities |
| 970000000 | Centered Broto-Moreau autocorrelation lag 0 weighted by polarizabilities              |
| 971000000 | Centered Broto-Moreau autocorrelation lag 1 weighted by polarizabilities              |
| 972000000 | Centered Broto-Moreau autocorrelation lag 2 weighted by polarizabilities              |
| 973000000 | Centered Broto-Moreau autocorrelation lag 3 weighted by polarizabilities              |
| 974000000 | Centered Broto-Moreau autocorrelation lag 4 weighted by polarizabilities              |
| 975000000 | Centered Broto-Moreau autocorrelation lag 5 weighted by polarizabilities              |
| 976000000 | Centered Broto-Moreau autocorrelation lag 6 weighted by polarizabilities              |
| 977000000 | Centered Broto-Moreau autocorrelation lag 7 weighted by polarizabilities              |

|            |                                                                                    |
|------------|------------------------------------------------------------------------------------|
| 978000000  | Centered Broto-Moreau autocorrelation lag 8 weighted by polarizabilities           |
| 979000000  | Centered Broto-Moreau autocorrelation lag 0 weighted by first ionization potential |
| 980000000  | Centered Broto-Moreau autocorrelation lag 1 weighted by first ionization potential |
| 981000000  | Centered Broto-Moreau autocorrelation lag 2 weighted by first ionization potential |
| 982000000  | Centered Broto-Moreau autocorrelation lag 3 weighted by first ionization potential |
| 983000000  | Centered Broto-Moreau autocorrelation lag 4 weighted by first ionization potential |
| 984000000  | Centered Broto-Moreau autocorrelation lag 5 weighted by first ionization potential |
| 985000000  | Centered Broto-Moreau autocorrelation lag 6 weighted by first ionization potential |
| 986000000  | Centered Broto-Moreau autocorrelation lag 7 weighted by first ionization potential |
| 987000000  | Centered Broto-Moreau autocorrelation lag 8 weighted by first ionization potential |
| 988000000  | Centered Broto-Moreau autocorrelation lag 0 weighted by I-state                    |
| 989000000  | Centered Broto-Moreau autocorrelation lag 1 weighted by I-state                    |
| 990000000  | Centered Broto-Moreau autocorrelation lag 2 weighted by I-state                    |
| 991000000  | Centered Broto-Moreau autocorrelation lag 3 weighted by I-state                    |
| 992000000  | Centered Broto-Moreau autocorrelation lag 4 weighted by I-state                    |
| 993000000  | Centered Broto-Moreau autocorrelation lag 5 weighted by I-state                    |
| 994000000  | Centered Broto-Moreau autocorrelation lag 6 weighted by I-state                    |
| 995000000  | Centered Broto-Moreau autocorrelation lag 7 weighted by I-state                    |
| 996000000  | Centered Broto-Moreau autocorrelation lag 8 weighted by I-state                    |
| 997000000  | Average centered Broto-Moreau autocorrelation lag 0 weighted by charges            |
| 998000000  | Average centered Broto-Moreau autocorrelation lag 1 weighted by charges            |
| 999000000  | Average centered Broto-Moreau autocorrelation lag 2 weighted by charges            |
| 1000000000 | Average centered Broto-Moreau autocorrelation lag 3 weighted by charges            |
| 1001000000 | Average centered Broto-Moreau autocorrelation lag 4 weighted by charges            |
| 1002000000 | Average centered Broto-Moreau autocorrelation lag 5 weighted by charges            |
| 1003000000 | Average centered Broto-Moreau autocorrelation lag 6 weighted by charges            |
| 1004000000 | Average centered Broto-Moreau autocorrelation lag 7 weighted by charges            |
| 1005000000 | Average centered Broto-Moreau autocorrelation lag 8 weighted by charges            |
| 1006000000 | Average centered Broto-Moreau autocorrelation lag 0 weighted by mass               |

|            |                                                                                               |
|------------|-----------------------------------------------------------------------------------------------|
| 1007000000 | Average centered Broto-Moreau autocorrelation lag 1 weighted by mass                          |
| 1008000000 | Average centered Broto-Moreau autocorrelation lag 2 weighted by mass                          |
| 1009000000 | Average centered Broto-Moreau autocorrelation lag 3 weighted by mass                          |
| 1010000000 | Average centered Broto-Moreau autocorrelation lag 4 weighted by mass                          |
| 1011000000 | Average centered Broto-Moreau autocorrelation lag 5 weighted by mass                          |
| 1012000000 | Average centered Broto-Moreau autocorrelation lag 6 weighted by mass                          |
| 1013000000 | Average centered Broto-Moreau autocorrelation lag 7 weighted by mass                          |
| 1014000000 | Average centered Broto-Moreau autocorrelation lag 8 weighted by mass                          |
| 1015000000 | Average centered Broto-Moreau autocorrelation lag 0 weighted by van der Waals volumes         |
| 1016000000 | Average centered Broto-Moreau autocorrelation lag 1 weighted by van der Waals volumes         |
| 1017000000 | Average centered Broto-Moreau autocorrelation lag 2 weighted by van der Waals volumes         |
| 1018000000 | Average centered Broto-Moreau autocorrelation lag 3 weighted by van der Waals volumes         |
| 1019000000 | Average centered Broto-Moreau autocorrelation lag 4 weighted by van der Waals volumes         |
| 1020000000 | Average centered Broto-Moreau autocorrelation lag 5 weighted by van der Waals volumes         |
| 1021000000 | Average centered Broto-Moreau autocorrelation lag 6 weighted by van der Waals volumes         |
| 1022000000 | Average centered Broto-Moreau autocorrelation lag 7 weighted by van der Waals volumes         |
| 1023000000 | Average centered Broto-Moreau autocorrelation lag 8 weighted by van der Waals volumes         |
| 1024000000 | Average centered Broto-Moreau autocorrelation lag 0 weighted by Sanderson electronegativities |
| 1025000000 | Average centered Broto-Moreau autocorrelation lag 1 weighted by Sanderson electronegativities |
| 1026000000 | Average centered Broto-Moreau autocorrelation lag 2 weighted by Sanderson electronegativities |
| 1027000000 | Average centered Broto-Moreau autocorrelation lag 3 weighted by Sanderson electronegativities |
| 1028000000 | Average centered Broto-Moreau autocorrelation lag 4 weighted by Sanderson electronegativities |
| 1029000000 | Average centered Broto-Moreau autocorrelation lag 5 weighted by Sanderson electronegativities |
| 1030000000 | Average centered Broto-Moreau autocorrelation lag 6 weighted by Sanderson electronegativities |
| 1031000000 | Average centered Broto-Moreau autocorrelation lag 7 weighted by Sanderson electronegativities |
| 1032000000 | Average centered Broto-Moreau autocorrelation lag 8 weighted by Sanderson electronegativities |
| 1033000000 | Average centered Broto-Moreau autocorrelation lag 0 weighted by polarizabilities              |
| 1034000000 | Average centered Broto-Moreau autocorrelation lag 1 weighted by polarizabilities              |
| 1035000000 | Average centered Broto-Moreau autocorrelation lag 2 weighted by polarizabilities              |



|            |                                                                                            |
|------------|--------------------------------------------------------------------------------------------|
| 1036000000 | Average centered Broto-Moreau autocorrelation lag 3 weighted by polarizabilities           |
| 1037000000 | Average centered Broto-Moreau autocorrelation lag 4 weighted by polarizabilities           |
| 1038000000 | Average centered Broto-Moreau autocorrelation lag 5 weighted by polarizabilities           |
| 1039000000 | Average centered Broto-Moreau autocorrelation lag 6 weighted by polarizabilities           |
| 1040000000 | Average centered Broto-Moreau autocorrelation lag 7 weighted by polarizabilities           |
| 1041000000 | Average centered Broto-Moreau autocorrelation lag 8 weighted by polarizabilities           |
| 1042000000 | Average centered Broto-Moreau autocorrelation lag 0 weighted by first ionization potential |
| 1043000000 | Average centered Broto-Moreau autocorrelation lag 1 weighted by first ionization potential |
| 1044000000 | Average centered Broto-Moreau autocorrelation lag 2 weighted by first ionization potential |
| 1045000000 | Average centered Broto-Moreau autocorrelation lag 3 weighted by first ionization potential |
| 1046000000 | Average centered Broto-Moreau autocorrelation lag 4 weighted by first ionization potential |
| 1047000000 | Average centered Broto-Moreau autocorrelation lag 5 weighted by first ionization potential |
| 1048000000 | Average centered Broto-Moreau autocorrelation lag 6 weighted by first ionization potential |
| 1049000000 | Average centered Broto-Moreau autocorrelation lag 7 weighted by first ionization potential |
| 1050000000 | Average centered Broto-Moreau autocorrelation lag 8 weighted by first ionization potential |
| 1051000000 | Average centered Broto-Moreau autocorrelation lag 0 weighted by I-state                    |
| 1052000000 | Average centered Broto-Moreau autocorrelation lag 1 weighted by I-state                    |
| 1053000000 | Average centered Broto-Moreau autocorrelation lag 2 weighted by I-state                    |
| 1054000000 | Average centered Broto-Moreau autocorrelation lag 3 weighted by I-state                    |
| 1055000000 | Average centered Broto-Moreau autocorrelation lag 4 weighted by I-state                    |
| 1056000000 | Average centered Broto-Moreau autocorrelation lag 5 weighted by I-state                    |
| 1057000000 | Average centered Broto-Moreau autocorrelation lag 6 weighted by I-state                    |
| 1058000000 | Average centered Broto-Moreau autocorrelation lag 7 weighted by I-state                    |
| 1059000000 | Average centered Broto-Moreau autocorrelation lag 8 weighted by I-state                    |
| 1060000000 | Moran autocorrelation lag 1 weighted by charges                                            |
| 1061000000 | Moran autocorrelation lag 2 weighted by charges                                            |
| 1062000000 | Moran autocorrelation lag 3 weighted by charges                                            |
| 1063000000 | Moran autocorrelation lag 4 weighted by charges                                            |
| 1064000000 | Moran autocorrelation lag 5 weighted by charges                                            |

|            |                                                                       |
|------------|-----------------------------------------------------------------------|
| 1065000000 | Moran autocorrelation lag 6 weighted by charges                       |
| 1066000000 | Moran autocorrelation lag 7 weighted by charges                       |
| 1067000000 | Moran autocorrelation lag 8 weighted by charges                       |
| 1068000000 | Moran autocorrelation lag 1 weighted by mass                          |
| 1069000000 | Moran autocorrelation lag 2 weighted by mass                          |
| 1070000000 | Moran autocorrelation lag 3 weighted by mass                          |
| 1071000000 | Moran autocorrelation lag 4 weighted by mass                          |
| 1072000000 | Moran autocorrelation lag 5 weighted by mass                          |
| 1073000000 | Moran autocorrelation lag 6 weighted by mass                          |
| 1074000000 | Moran autocorrelation lag 7 weighted by mass                          |
| 1075000000 | Moran autocorrelation lag 8 weighted by mass                          |
| 1076000000 | Moran autocorrelation lag 1 weighted by van der Waals volumes         |
| 1077000000 | Moran autocorrelation lag 2 weighted by van der Waals volumes         |
| 1078000000 | Moran autocorrelation lag 3 weighted by van der Waals volumes         |
| 1079000000 | Moran autocorrelation lag 4 weighted by van der Waals volumes         |
| 1080000000 | Moran autocorrelation lag 5 weighted by van der Waals volumes         |
| 1081000000 | Moran autocorrelation lag 6 weighted by van der Waals volumes         |
| 1082000000 | Moran autocorrelation lag 7 weighted by van der Waals volumes         |
| 1083000000 | Moran autocorrelation lag 8 weighted by van der Waals volumes         |
| 1084000000 | Moran autocorrelation lag 1 weighted by Sanderson electronegativities |
| 1085000000 | Moran autocorrelation lag 2 weighted by Sanderson electronegativities |
| 1086000000 | Moran autocorrelation lag 3 weighted by Sanderson electronegativities |
| 1087000000 | Moran autocorrelation lag 4 weighted by Sanderson electronegativities |
| 1088000000 | Moran autocorrelation lag 5 weighted by Sanderson electronegativities |
| 1089000000 | Moran autocorrelation lag 6 weighted by Sanderson electronegativities |
| 1090000000 | Moran autocorrelation lag 7 weighted by Sanderson electronegativities |
| 1091000000 | Moran autocorrelation lag 8 weighted by Sanderson electronegativities |
| 1092000000 | Moran autocorrelation lag 1 weighted by polarizabilities              |
| 1093000000 | Moran autocorrelation lag 2 weighted by polarizabilities              |

|            |                                                                    |
|------------|--------------------------------------------------------------------|
| 1094000000 | Moran autocorrelation lag 3 weighted by polarizabilities           |
| 1095000000 | Moran autocorrelation lag 4 weighted by polarizabilities           |
| 1096000000 | Moran autocorrelation lag 5 weighted by polarizabilities           |
| 1097000000 | Moran autocorrelation lag 6 weighted by polarizabilities           |
| 1098000000 | Moran autocorrelation lag 7 weighted by polarizabilities           |
| 1099000000 | Moran autocorrelation lag 8 weighted by polarizabilities           |
| 1100000000 | Moran autocorrelation lag 1 weighted by first ionization potential |
| 1101000000 | Moran autocorrelation lag 2 weighted by first ionization potential |
| 1102000000 | Moran autocorrelation lag 3 weighted by first ionization potential |
| 1103000000 | Moran autocorrelation lag 4 weighted by first ionization potential |
| 1104000000 | Moran autocorrelation lag 5 weighted by first ionization potential |
| 1105000000 | Moran autocorrelation lag 6 weighted by first ionization potential |
| 1106000000 | Moran autocorrelation lag 7 weighted by first ionization potential |
| 1107000000 | Moran autocorrelation lag 8 weighted by first ionization potential |
| 1108000000 | Moran autocorrelation lag 1 weighted by I-state                    |
| 1109000000 | Moran autocorrelation lag 2 weighted by I-state                    |
| 1110000000 | Moran autocorrelation lag 3 weighted by I-state                    |
| 1111000000 | Moran autocorrelation lag 4 weighted by I-state                    |
| 1112000000 | Moran autocorrelation lag 5 weighted by I-state                    |
| 1113000000 | Moran autocorrelation lag 6 weighted by I-state                    |
| 1114000000 | Moran autocorrelation lag 7 weighted by I-state                    |
| 1115000000 | Moran autocorrelation lag 8 weighted by I-state                    |
| 1116000000 | Geary autocorrelation lag 1 weighted by charges                    |
| 1117000000 | Geary autocorrelation lag 2 weighted by charges                    |
| 1118000000 | Geary autocorrelation lag 3 weighted by charges                    |
| 1119000000 | Geary autocorrelation lag 4 weighted by charges                    |
| 1120000000 | Geary autocorrelation lag 5 weighted by charges                    |
| 1121000000 | Geary autocorrelation lag 6 weighted by charges                    |
| 1122000000 | Geary autocorrelation lag 7 weighted by charges                    |

|            |                                                                       |
|------------|-----------------------------------------------------------------------|
| 1123000000 | Geary autocorrelation lag 8 weighted by charges                       |
| 1124000000 | Geary autocorrelation lag 1 weighted by mass                          |
| 1125000000 | Geary autocorrelation lag 2 weighted by mass                          |
| 1126000000 | Geary autocorrelation lag 3 weighted by mass                          |
| 1127000000 | Geary autocorrelation lag 4 weighted by mass                          |
| 1128000000 | Geary autocorrelation lag 5 weighted by mass                          |
| 1129000000 | Geary autocorrelation lag 6 weighted by mass                          |
| 1130000000 | Geary autocorrelation lag 7 weighted by mass                          |
| 1131000000 | Geary autocorrelation lag 8 weighted by mass                          |
| 1132000000 | Geary autocorrelation lag 1 weighted by van der Waals volumes         |
| 1133000000 | Geary autocorrelation lag 2 weighted by van der Waals volumes         |
| 1134000000 | Geary autocorrelation lag 3 weighted by van der Waals volumes         |
| 1135000000 | Geary autocorrelation lag 4 weighted by van der Waals volumes         |
| 1136000000 | Geary autocorrelation lag 5 weighted by van der Waals volumes         |
| 1137000000 | Geary autocorrelation lag 6 weighted by van der Waals volumes         |
| 1138000000 | Geary autocorrelation lag 7 weighted by van der Waals volumes         |
| 1139000000 | Geary autocorrelation lag 8 weighted by van der Waals volumes         |
| 1140000000 | Geary autocorrelation lag 1 weighted by Sanderson electronegativities |
| 1141000000 | Geary autocorrelation lag 2 weighted by Sanderson electronegativities |
| 1142000000 | Geary autocorrelation lag 3 weighted by Sanderson electronegativities |
| 1143000000 | Geary autocorrelation lag 4 weighted by Sanderson electronegativities |
| 1144000000 | Geary autocorrelation lag 5 weighted by Sanderson electronegativities |
| 1145000000 | Geary autocorrelation lag 6 weighted by Sanderson electronegativities |
| 1146000000 | Geary autocorrelation lag 7 weighted by Sanderson electronegativities |
| 1147000000 | Geary autocorrelation lag 8 weighted by Sanderson electronegativities |
| 1148000000 | Geary autocorrelation lag 1 weighted by polarizabilities              |
| 1149000000 | Geary autocorrelation lag 2 weighted by polarizabilities              |
| 1150000000 | Geary autocorrelation lag 3 weighted by polarizabilities              |
| 1151000000 | Geary autocorrelation lag 4 weighted by polarizabilities              |

|            |                                                                                        |
|------------|----------------------------------------------------------------------------------------|
| 1152000000 | Geary autocorrelation lag 5 weighted by polarizabilities                               |
| 1153000000 | Geary autocorrelation lag 6 weighted by polarizabilities                               |
| 1154000000 | Geary autocorrelation lag 7 weighted by polarizabilities                               |
| 1155000000 | Geary autocorrelation lag 8 weighted by polarizabilities                               |
| 1156000000 | Geary autocorrelation lag 1 weighted by first ionization potential                     |
| 1157000000 | Geary autocorrelation lag 2 weighted by first ionization potential                     |
| 1158000000 | Geary autocorrelation lag 3 weighted by first ionization potential                     |
| 1159000000 | Geary autocorrelation lag 4 weighted by first ionization potential                     |
| 1160000000 | Geary autocorrelation lag 5 weighted by first ionization potential                     |
| 1161000000 | Geary autocorrelation lag 6 weighted by first ionization potential                     |
| 1162000000 | Geary autocorrelation lag 7 weighted by first ionization potential                     |
| 1163000000 | Geary autocorrelation lag 8 weighted by first ionization potential                     |
| 1164000000 | Geary autocorrelation lag 1 weighted by I-state                                        |
| 1165000000 | Geary autocorrelation lag 2 weighted by I-state                                        |
| 1166000000 | Geary autocorrelation lag 3 weighted by I-state                                        |
| 1167000000 | Geary autocorrelation lag 4 weighted by I-state                                        |
| 1168000000 | Geary autocorrelation lag 5 weighted by I-state                                        |
| 1169000000 | Geary autocorrelation lag 6 weighted by I-state                                        |
| 1170000000 | Geary autocorrelation lag 7 weighted by I-state                                        |
| 1171000000 | Geary autocorrelation lag 8 weighted by I-state                                        |
| 1172000000 | Largest absolute eigenvalue of Burden modified matrix - n 1 weighted by relative mass  |
| 1173000000 | Largest absolute eigenvalue of Burden modified matrix - n 2 weighted by relative mass  |
| 1174000000 | Largest absolute eigenvalue of Burden modified matrix - n 3 weighted by relative mass  |
| 1175000000 | Largest absolute eigenvalue of Burden modified matrix - n 4 weighted by relative mass  |
| 1176000000 | Largest absolute eigenvalue of Burden modified matrix - n 5 weighted by relative mass  |
| 1177000000 | Largest absolute eigenvalue of Burden modified matrix - n 6 weighted by relative mass  |
| 1178000000 | Largest absolute eigenvalue of Burden modified matrix - n 7 weighted by relative mass  |
| 1179000000 | Largest absolute eigenvalue of Burden modified matrix - n 8 weighted by relative mass  |
| 1180000000 | Smallest absolute eigenvalue of Burden modified matrix - n 1 weighted by relative mass |

|            |                                                                                                                |
|------------|----------------------------------------------------------------------------------------------------------------|
| 1181000000 | Smallest absolute eigenvalue of Burden modified matrix - n 2 weighted by relative mass                         |
| 1182000000 | Smallest absolute eigenvalue of Burden modified matrix - n 3 weighted by relative mass                         |
| 1183000000 | Smallest absolute eigenvalue of Burden modified matrix - n 4 weighted by relative mass                         |
| 1184000000 | Smallest absolute eigenvalue of Burden modified matrix - n 5 weighted by relative mass                         |
| 1185000000 | Smallest absolute eigenvalue of Burden modified matrix - n 6 weighted by relative mass                         |
| 1186000000 | Smallest absolute eigenvalue of Burden modified matrix - n 7 weighted by relative mass                         |
| 1187000000 | Smallest absolute eigenvalue of Burden modified matrix - n 8 weighted by relative mass                         |
| 1188000000 | Largest absolute eigenvalue of Burden modified matrix - n 1 weighted by relative van der Waals volumes         |
| 1189000000 | Largest absolute eigenvalue of Burden modified matrix - n 2 weighted by relative van der Waals volumes         |
| 1190000000 | Largest absolute eigenvalue of Burden modified matrix - n 3 weighted by relative van der Waals volumes         |
| 1191000000 | Largest absolute eigenvalue of Burden modified matrix - n 4 weighted by relative van der Waals volumes         |
| 1192000000 | Largest absolute eigenvalue of Burden modified matrix - n 5 weighted by relative van der Waals volumes         |
| 1193000000 | Largest absolute eigenvalue of Burden modified matrix - n 6 weighted by relative van der Waals volumes         |
| 1194000000 | Largest absolute eigenvalue of Burden modified matrix - n 7 weighted by relative van der Waals volumes         |
| 1195000000 | Largest absolute eigenvalue of Burden modified matrix - n 8 weighted by relative van der Waals volumes         |
| 1196000000 | Smallest absolute eigenvalue of Burden modified matrix - n 1 weighted by relative van der Waals volumes        |
| 1197000000 | Smallest absolute eigenvalue of Burden modified matrix - n 2 weighted by relative van der Waals volumes        |
| 1198000000 | Smallest absolute eigenvalue of Burden modified matrix - n 3 weighted by relative van der Waals volumes        |
| 1199000000 | Smallest absolute eigenvalue of Burden modified matrix - n 4 weighted by relative van der Waals volumes        |
| 1200000000 | Smallest absolute eigenvalue of Burden modified matrix - n 5 weighted by relative van der Waals volumes        |
| 1201000000 | Smallest absolute eigenvalue of Burden modified matrix - n 6 weighted by relative van der Waals volumes        |
| 1202000000 | Smallest absolute eigenvalue of Burden modified matrix - n 7 weighted by relative van der Waals volumes        |
| 1203000000 | Smallest absolute eigenvalue of Burden modified matrix - n 8 weighted by relative van der Waals volumes        |
| 1204000000 | Largest absolute eigenvalue of Burden modified matrix - n 1 weighted by relative Sanderson electronegativities |
| 1205000000 | Largest absolute eigenvalue of Burden modified matrix - n 2 weighted by relative Sanderson electronegativities |
| 1206000000 | Largest absolute eigenvalue of Burden modified matrix - n 3 weighted by relative Sanderson electronegativities |
| 1207000000 | Largest absolute eigenvalue of Burden modified matrix - n 4 weighted by relative Sanderson electronegativities |
| 1208000000 | Largest absolute eigenvalue of Burden modified matrix - n 5 weighted by relative Sanderson electronegativities |
| 1209000000 | Largest absolute eigenvalue of Burden modified matrix - n 6 weighted by relative Sanderson electronegativities |

|            |                                                                                                                 |
|------------|-----------------------------------------------------------------------------------------------------------------|
| 1210000000 | Largest absolute eigenvalue of Burden modified matrix - n 7 weighted by relative Sanderson electronegativities  |
| 1211000000 | Largest absolute eigenvalue of Burden modified matrix - n 8 weighted by relative Sanderson electronegativities  |
| 1212000000 | Smallest absolute eigenvalue of Burden modified matrix - n 1 weighted by relative Sanderson electronegativities |
| 1213000000 | Smallest absolute eigenvalue of Burden modified matrix - n 2 weighted by relative Sanderson electronegativities |
| 1214000000 | Smallest absolute eigenvalue of Burden modified matrix - n 3 weighted by relative Sanderson electronegativities |
| 1215000000 | Smallest absolute eigenvalue of Burden modified matrix - n 4 weighted by relative Sanderson electronegativities |
| 1216000000 | Smallest absolute eigenvalue of Burden modified matrix - n 5 weighted by relative Sanderson electronegativities |
| 1217000000 | Smallest absolute eigenvalue of Burden modified matrix - n 6 weighted by relative Sanderson electronegativities |
| 1218000000 | Smallest absolute eigenvalue of Burden modified matrix - n 7 weighted by relative Sanderson electronegativities |
| 1219000000 | Smallest absolute eigenvalue of Burden modified matrix - n 8 weighted by relative Sanderson electronegativities |
| 1220000000 | Largest absolute eigenvalue of Burden modified matrix - n 1 weighted by relative polarizabilities               |
| 1221000000 | Largest absolute eigenvalue of Burden modified matrix - n 2 weighted by relative polarizabilities               |
| 1222000000 | Largest absolute eigenvalue of Burden modified matrix - n 3 weighted by relative polarizabilities               |
| 1223000000 | Largest absolute eigenvalue of Burden modified matrix - n 4 weighted by relative polarizabilities               |
| 1224000000 | Largest absolute eigenvalue of Burden modified matrix - n 5 weighted by relative polarizabilities               |
| 1225000000 | Largest absolute eigenvalue of Burden modified matrix - n 6 weighted by relative polarizabilities               |
| 1226000000 | Largest absolute eigenvalue of Burden modified matrix - n 7 weighted by relative polarizabilities               |
| 1227000000 | Largest absolute eigenvalue of Burden modified matrix - n 8 weighted by relative polarizabilities               |
| 1228000000 | Smallest absolute eigenvalue of Burden modified matrix - n 1 weighted by relative polarizabilities              |
| 1229000000 | Smallest absolute eigenvalue of Burden modified matrix - n 2 weighted by relative polarizabilities              |
| 1230000000 | Smallest absolute eigenvalue of Burden modified matrix - n 3 weighted by relative polarizabilities              |
| 1231000000 | Smallest absolute eigenvalue of Burden modified matrix - n 4 weighted by relative polarizabilities              |
| 1232000000 | Smallest absolute eigenvalue of Burden modified matrix - n 5 weighted by relative polarizabilities              |
| 1233000000 | Smallest absolute eigenvalue of Burden modified matrix - n 6 weighted by relative polarizabilities              |
| 1234000000 | Smallest absolute eigenvalue of Burden modified matrix - n 7 weighted by relative polarizabilities              |
| 1235000000 | Smallest absolute eigenvalue of Burden modified matrix - n 8 weighted by relative polarizabilities              |
| 1236000000 | Largest absolute eigenvalue of Burden modified matrix - n 1 weighted by relative first ionization potential     |
| 1237000000 | Largest absolute eigenvalue of Burden modified matrix - n 2 weighted by relative first ionization potential     |
| 1238000000 | Largest absolute eigenvalue of Burden modified matrix - n 3 weighted by relative first ionization potential     |

|            |                                                                                                              |
|------------|--------------------------------------------------------------------------------------------------------------|
| 1239000000 | Largest absolute eigenvalue of Burden modified matrix - n 4 weighted by relative first ionization potential  |
| 1240000000 | Largest absolute eigenvalue of Burden modified matrix - n 5 weighted by relative first ionization potential  |
| 1241000000 | Largest absolute eigenvalue of Burden modified matrix - n 6 weighted by relative first ionization potential  |
| 1242000000 | Largest absolute eigenvalue of Burden modified matrix - n 7 weighted by relative first ionization potential  |
| 1243000000 | Largest absolute eigenvalue of Burden modified matrix - n 8 weighted by relative first ionization potential  |
| 1244000000 | Smallest absolute eigenvalue of Burden modified matrix - n 1 weighted by relative first ionization potential |
| 1245000000 | Smallest absolute eigenvalue of Burden modified matrix - n 2 weighted by relative first ionization potential |
| 1246000000 | Smallest absolute eigenvalue of Burden modified matrix - n 3 weighted by relative first ionization potential |
| 1247000000 | Smallest absolute eigenvalue of Burden modified matrix - n 4 weighted by relative first ionization potential |
| 1248000000 | Smallest absolute eigenvalue of Burden modified matrix - n 5 weighted by relative first ionization potential |
| 1249000000 | Smallest absolute eigenvalue of Burden modified matrix - n 6 weighted by relative first ionization potential |
| 1250000000 | Smallest absolute eigenvalue of Burden modified matrix - n 7 weighted by relative first ionization potential |
| 1251000000 | Smallest absolute eigenvalue of Burden modified matrix - n 8 weighted by relative first ionization potential |
| 1252000000 | Largest absolute eigenvalue of Burden modified matrix - n 1 weighted by relative I-state                     |
| 1253000000 | Largest absolute eigenvalue of Burden modified matrix - n 2 weighted by relative I-state                     |
| 1254000000 | Largest absolute eigenvalue of Burden modified matrix - n 3 weighted by relative I-state                     |
| 1255000000 | Largest absolute eigenvalue of Burden modified matrix - n 4 weighted by relative I-state                     |
| 1256000000 | Largest absolute eigenvalue of Burden modified matrix - n 5 weighted by relative I-state                     |
| 1257000000 | Largest absolute eigenvalue of Burden modified matrix - n 6 weighted by relative I-state                     |
| 1258000000 | Largest absolute eigenvalue of Burden modified matrix - n 7 weighted by relative I-state                     |
| 1259000000 | Largest absolute eigenvalue of Burden modified matrix - n 8 weighted by relative I-state                     |
| 1260000000 | Smallest absolute eigenvalue of Burden modified matrix - n 1 weighted by relative I-state                    |
| 1261000000 | Smallest absolute eigenvalue of Burden modified matrix - n 2 weighted by relative I-state                    |
| 1262000000 | Smallest absolute eigenvalue of Burden modified matrix - n 3 weighted by relative I-state                    |
| 1263000000 | Smallest absolute eigenvalue of Burden modified matrix - n 4 weighted by relative I-state                    |
| 1264000000 | Smallest absolute eigenvalue of Burden modified matrix - n 5 weighted by relative I-state                    |
| 1265000000 | Smallest absolute eigenvalue of Burden modified matrix - n 6 weighted by relative I-state                    |
| 1266000000 | Smallest absolute eigenvalue of Burden modified matrix - n 7 weighted by relative I-state                    |
| 1267000000 | Smallest absolute eigenvalue of Burden modified matrix - n 8 weighted by relative I-state                    |



|            |                                          |
|------------|------------------------------------------|
| 1268000000 | Number of 3-membered rings               |
| 1269000000 | Number of 4-membered rings               |
| 1270000000 | Number of 5-membered rings               |
| 1271000000 | Number of 6-membered rings               |
| 1272000000 | Number of 7-membered rings               |
| 1273000000 | Number of 8-membered rings               |
| 1274000000 | Number of 9-membered rings               |
| 1275000000 | Number of 10-membered rings              |
| 1276000000 | Number of 11-membered rings              |
| 1277000000 | Number of 12-membered rings              |
| 1278000000 | Number of >12-membered rings             |
| 1279000000 | Number of fused rings                    |
| 1280000000 | Number of 4-membered fused rings         |
| 1281000000 | Number of 5-membered fused rings         |
| 1282000000 | Number of 6-membered fused rings         |
| 1283000000 | Number of 7-membered fused rings         |
| 1284000000 | Min resonance energy for bond H - N      |
| 1285000000 | Max resonance energy for bond H - N      |
| 1286000000 | Min exchange energy for bond H - N       |
| 1287000000 | Max exchange energy for bond H - N       |
| 1288000000 | Min e-e repulsion for bond H - N         |
| 1289000000 | Max e-e repulsion for bond H - N         |
| 1290000000 | Min e-n attraction for bond H - N        |
| 1291000000 | Max e-n attraction for bond H - N        |
| 1292000000 | Min n-n repulsion for bond H - N         |
| 1293000000 | Max n-n repulsion for bond H - N         |
| 1294000000 | Min coulombic interaction for bond H - N |
| 1295000000 | Max coulombic interaction for bond H - N |
| 1296000000 | Min total interaction for bond H - N     |

|            |                                                             |
|------------|-------------------------------------------------------------|
| 1297000000 | Max total interaction for bond H - N                        |
| 1298000000 | Min valency for atom Cl                                     |
| 1299000000 | Max valency for atom Cl                                     |
| 1300000000 | Min (>0.1) bond order for atom Cl                           |
| 1301000000 | Max bond order for atom Cl                                  |
| 1302000000 | Min e-e repulsion for atom Cl                               |
| 1303000000 | Max e-e repulsion for atom Cl                               |
| 1304000000 | Min e-n attraction for atom Cl                              |
| 1305000000 | Max e-n attraction for atom Cl                              |
| 1306000000 | Min atomic state energy for atom Cl                         |
| 1307000000 | Max atomic state energy for atom Cl                         |
| 1308000000 | Min resonance energy for bond C - Cl                        |
| 1309000000 | Max resonance energy for bond C - Cl                        |
| 1310000000 | Min exchange energy for bond C - Cl                         |
| 1311000000 | Max exchange energy for bond C - Cl                         |
| 1312000000 | Min e-e repulsion for bond C - Cl                           |
| 1313000000 | Max e-e repulsion for bond C - Cl                           |
| 1314000000 | Min e-n attraction for bond C - Cl                          |
| 1315000000 | Max e-n attraction for bond C - Cl                          |
| 1316000000 | Min n-n repulsion for bond C - Cl                           |
| 1317000000 | Max n-n repulsion for bond C - Cl                           |
| 1318000000 | Min coulombic interaction for bond C - Cl                   |
| 1319000000 | Max coulombic interaction for bond C - Cl                   |
| 1320000000 | Min total interaction for bond C - Cl                       |
| 1321000000 | Max total interaction for bond C - Cl                       |
| 1322000000 | Min resonance energy for interaction C - Cl in 2 bonds path |
| 1323000000 | Max resonance energy for interaction C - Cl in 2 bonds path |
| 1324000000 | Min exchange energy for interaction C - Cl in 2 bonds path  |
| 1325000000 | Max exchange energy for interaction C - Cl in 2 bonds path  |

|            |                                                                  |
|------------|------------------------------------------------------------------|
| 1326000000 | Min e-e repulsion for interaction C - Cl in 2 bonds path         |
| 1327000000 | Max e-e repulsion for interaction C - Cl in 2 bonds path         |
| 1328000000 | Min e-n attraction for interaction C - Cl in 2 bonds path        |
| 1329000000 | Max e-n attraction for interaction C - Cl in 2 bonds path        |
| 1330000000 | Min n-n repulsion for interaction C - Cl in 2 bonds path         |
| 1331000000 | Max n-n repulsion for interaction C - Cl in 2 bonds path         |
| 1332000000 | Min coulumbic interaction for interaction C - Cl in 2 bonds path |
| 1333000000 | Max coulumbic interaction for interaction C - Cl in 2 bonds path |
| 1334000000 | Min total interaction for interaction C - Cl in 2 bonds path     |
| 1335000000 | Max total interaction for interaction C - Cl in 2 bonds path     |
| 1336000000 | Min resonance energy for interaction C - Cl in 3 bonds path      |
| 1337000000 | Max resonance energy for interaction C - Cl in 3 bonds path      |
| 1338000000 | Min exchange energy for interaction C - Cl in 3 bonds path       |
| 1339000000 | Max exchange energy for interaction C - Cl in 3 bonds path       |
| 1340000000 | Min e-e repulsion for interaction C - Cl in 3 bonds path         |
| 1341000000 | Max e-e repulsion for interaction C - Cl in 3 bonds path         |
| 1342000000 | Min e-n attraction for interaction C - Cl in 3 bonds path        |
| 1343000000 | Max e-n attraction for interaction C - Cl in 3 bonds path        |
| 1344000000 | Min n-n repulsion for interaction C - Cl in 3 bonds path         |
| 1345000000 | Max n-n repulsion for interaction C - Cl in 3 bonds path         |
| 1346000000 | Min coulumbic interaction for interaction C - Cl in 3 bonds path |
| 1347000000 | Max coulumbic interaction for interaction C - Cl in 3 bonds path |
| 1348000000 | Min total interaction for interaction C - Cl in 3 bonds path     |
| 1349000000 | Max total interaction for interaction C - Cl in 3 bonds path     |
| 1350000000 | Min resonance energy for interaction C - Cl in > 3 bonds path    |
| 1351000000 | Max resonance energy for interaction C - Cl in > 3 bonds path    |
| 1352000000 | Min exchange energy for interaction C - Cl in > 3 bonds path     |
| 1353000000 | Max exchange energy for interaction C - Cl in > 3 bonds path     |
| 1354000000 | Min e-e repulsion for interaction C - Cl in > 3 bonds path       |

|            |                                                                    |
|------------|--------------------------------------------------------------------|
| 1355000000 | Max e-e repulsion for interaction C - Cl in > 3 bonds path         |
| 1356000000 | Min e-n attraction for interaction C - Cl in > 3 bonds path        |
| 1357000000 | Max e-n attraction for interaction C - Cl in > 3 bonds path        |
| 1358000000 | Min n-n repulsion for interaction C - Cl in > 3 bonds path         |
| 1359000000 | Max n-n repulsion for interaction C - Cl in > 3 bonds path         |
| 1360000000 | Min coulombic interaction for interaction C - Cl in > 3 bonds path |
| 1361000000 | Max coulombic interaction for interaction C - Cl in > 3 bonds path |
| 1362000000 | Min total interaction for interaction C - Cl in > 3 bonds path     |
| 1363000000 | Max total interaction for interaction C - Cl in > 3 bonds path     |
| 1364000000 | [CD1H2]=*                                                          |
| 1365000000 | [CD2H](=*)-*                                                       |
| 1367000000 | [CD2H0](=*)=*                                                      |
| 1368000000 | [CD3H0](=*)(-*)-*                                                  |
| 1369000000 | [C,c                                                               |
| 1370000000 | [C,c                                                               |
| 1371000000 | [ND1H]=*                                                           |
| 1372000000 | [ND2H0](=*)-*                                                      |
| 1373000000 | [OD1H0]=*                                                          |
| 1374000000 | [PD4H0](=*)(-*)(-*)-*                                              |
| 1375000000 | [SD1H0]=*                                                          |
| 1376000000 | [SD3H0](=*)(-*)-*                                                  |
| 1377000000 | [AsD4H0](=*)(-*)(-*)-*                                             |
| 1378000000 | [SeD1H0]=*                                                         |
| 1379000000 | [SeD3H0](=*)(-*)-*                                                 |
| 1380000000 | [SeD4H0](=*)(=*)(-*)-*                                             |
| 1381000000 | Number of 8-membered fused rings                                   |
| 1382000000 | Number of 9-membered fused rings                                   |
| 1383000000 | Number of 10-membered fused rings                                  |
| 1384000000 | Number of 11-membered fused rings                                  |

|            |                                                                                   |
|------------|-----------------------------------------------------------------------------------|
| 1385000000 | Number of 12-membered fused rings                                                 |
| 1386000000 | Number of >12-membered fused rings                                                |
| 1387000000 | Number of rings (includes counts from fused rings)                                |
| 1388000000 | Number of 4-membered rings (includes counts from fused rings)                     |
| 1389000000 | Number of 5-membered rings (includes counts from fused rings)                     |
| 1390000000 | Number of 6-membered rings (includes counts from fused rings)                     |
| 1391000000 | Number of 7-membered rings (includes counts from fused rings)                     |
| 1392000000 | Number of 8-membered rings (includes counts from fused rings)                     |
| 1393000000 | Number of 9-membered rings (includes counts from fused rings)                     |
| 1394000000 | Number of 10-membered rings (includes counts from fused rings)                    |
| 1395000000 | Number of 11-membered rings (includes counts from fused rings)                    |
| 1396000000 | Number of 12-membered rings (includes counts from fused rings)                    |
| 1397000000 | Number of >12-membered rings (includes counts from fused rings)                   |
| 1398000000 | Number of rings containing heteroatoms (N, O, P, S, or halogens)                  |
| 1399000000 | Number of 3-membered rings containing heteroatoms (N, O, P, S, or halogens)       |
| 1400000000 | Number of 4-membered rings containing heteroatoms (N, O, P, S, or halogens)       |
| 1401000000 | Number of 5-membered rings containing heteroatoms (N, O, P, S, or halogens)       |
| 1402000000 | Number of 6-membered rings containing heteroatoms (N, O, P, S, or halogens)       |
| 1403000000 | Number of 7-membered rings containing heteroatoms (N, O, P, S, or halogens)       |
| 1404000000 | Number of 8-membered rings containing heteroatoms (N, O, P, S, or halogens)       |
| 1405000000 | Number of 9-membered rings containing heteroatoms (N, O, P, S, or halogens)       |
| 1406000000 | Number of 10-membered rings containing heteroatoms (N, O, P, S, or halogens)      |
| 1407000000 | Number of 11-membered rings containing heteroatoms (N, O, P, S, or halogens)      |
| 1408000000 | Number of 12-membered rings containing heteroatoms (N, O, P, S, or halogens)      |
| 1409000000 | Number of >12-membered rings containing heteroatoms (N, O, P, S, or halogens)     |
| 1410000000 | Number of fused rings containing heteroatoms (N, O, P, S, or halogens)            |
| 1411000000 | Number of 4-membered fused rings containing heteroatoms (N, O, P, S, or halogens) |
| 1412000000 | Number of 5-membered fused rings containing heteroatoms (N, O, P, S, or halogens) |
| 1413000000 | Number of 6-membered fused rings containing heteroatoms (N, O, P, S, or halogens) |

|            |                                                                                                                  |
|------------|------------------------------------------------------------------------------------------------------------------|
| 1414000000 | Number of 7-membered fused rings containing heteroatoms (N, O, P, S, or halogens)                                |
| 1415000000 | Number of 8-membered fused rings containing heteroatoms (N, O, P, S, or halogens)                                |
| 1416000000 | Number of 9-membered fused rings containing heteroatoms (N, O, P, S, or halogens)                                |
| 1417000000 | Number of 10-membered fused rings containing heteroatoms (N, O, P, S, or halogens)                               |
| 1418000000 | Number of 11-membered fused rings containing heteroatoms (N, O, P, S, or halogens)                               |
| 1419000000 | Number of 12-membered fused rings containing heteroatoms (N, O, P, S, or halogens)                               |
| 1420000000 | Number of >12-membered fused rings containing heteroatoms (N, O, P, S, or halogens)                              |
| 1421000000 | Number of rings (includes counts from fused rings) containing heteroatoms (N, O, P, S, or halogens)              |
| 1422000000 | Number of 4-membered rings (includes counts from fused rings) containing heteroatoms (N, O, P, S, or halogens)   |
| 1423000000 | Number of 5-membered rings (includes counts from fused rings) containing heteroatoms (N, O, P, S, or halogens)   |
| 1424000000 | Number of 6-membered rings (includes counts from fused rings) containing heteroatoms (N, O, P, S, or halogens)   |
| 1425000000 | Number of 7-membered rings (includes counts from fused rings) containing heteroatoms (N, O, P, S, or halogens)   |
| 1426000000 | Number of 8-membered rings (includes counts from fused rings) containing heteroatoms (N, O, P, S, or halogens)   |
| 1427000000 | Number of 9-membered rings (includes counts from fused rings) containing heteroatoms (N, O, P, S, or halogens)   |
| 1428000000 | Number of 10-membered rings (includes counts from fused rings) containing heteroatoms (N, O, P, S, or halogens)  |
| 1429000000 | Number of 11-membered rings (includes counts from fused rings) containing heteroatoms (N, O, P, S, or halogens)  |
| 1430000000 | Number of 12-membered rings (includes counts from fused rings) containing heteroatoms (N, O, P, S, or halogens)  |
| 1431000000 | Number of >12-membered rings (includes counts from fused rings) containing heteroatoms (N, O, P, S, or halogens) |
